# Supplementary material for: Multifunctionality of the [C2mim][Ln(fod)4] series (Ln = Nd–Tm except Pm): magnetic, luminescence and thermochemical studies
Source: Royal Society of Chemistry journal article supplement (doi:10.1039/d2nj01415g), 2022-01-01
Supplement: d2nj01415g1.pdf [file d2nj01415g1.pdf]

## Electronic Supplementary Information

# Multifunctionality of the $[C_2mim][Ln(fod)_4]$ series (Ln = Nd-Tm except Pm): Magnetic, Luminescent and Thermochemical studies

Ana C. Cerdeira<sup>1</sup>, João P. Leal<sup>2</sup>, João Avó<sup>3</sup>, Catarina Viola<sup>4</sup>, Maria H. Casimiro<sup>5</sup>, Luis M. Ferreira<sup>1</sup>, Filipe A. A. Paz<sup>6</sup>, Laura C. J. Pereira<sup>1,\*</sup>, Cláudia C. L. Pereira<sup>4,\*</sup> and Bernardo Monteiro<sup>7,\*</sup>

- <sup>1</sup> Centro de Ciências e Tecnologias Nucleares (C2TN), DECN, Instituto Superior Técnico, Universidade de Lisboa, Campus Tecnológico e Nuclear, Estrada Nacional 10, 2695-066 Bobadela, Portugal.
  - <sup>2</sup> Centro de Química Estrutural (CQE), Institute of Molecular Sciences, DECN, Instituto Superior Técnico, Universidade de Lisboa, Campus Tecnológico e Nuclear, Estrada Nacional 10, 2695-066 Bobadela, Portugal.
  - <sup>3</sup> Associate Laboratory i4HB—Institute for Health and Bioeconomy and Institute for Bioengineering and Biosciences (IBB), Instituto Superior Técnico, Universidade de Lisboa, Av. Rovisco Pais, 1049-001 Lisboa, Portugal.
  - <sup>4</sup> LAQV-REQUIMTE, Dep. de Química, Universidade Nova de Lisboa, 2829-516, Monte de Caparica, Portugal.
  - <sup>5</sup> Centro de Ciências e Tecnologias Nucleares (C2TN), Instituto Superior Técnico, Universidade de Lisboa, Campus Tecnológico e Nuclear, Estrada Nacional 10, 2695-066 Bobadela, Portugal.
  - <sup>6</sup> Department of Chemistry, CICECO-Aveiro Institute of Materials, University of Aveiro, 3810-193 Aveiro, Portugal.
  - <sup>7</sup> Centro de Química Estrutural (CQE), Institute of Molecular Sciences, DEQ, Instituto Superior Técnico, Universidade de Lisboa, Campus Tecnológico e Nuclear, Estrada Nacional 10, 2695-066 Bobadela, Portugal.
- \* Correspondence: [lpereira@ctn.tecnico.ulisboa.pt](mailto:lpereira@ctn.tecnico.ulisboa.pt) (LCJP); [ccl.pereira@fct.unl.pt](mailto:ccl.pereira@fct.unl.pt) (CCLP); [bernardo.monteiro@ctn.tecnico.ulisboa.pt](mailto:bernardo.monteiro@ctn.tecnico.ulisboa.pt) (BM).

## Contents:

|                                              |     |
|----------------------------------------------|-----|
| 1) ESI-MS Studies                            | S2  |
| 1) FT-IR Studies                             | S8  |
| 2) Powder X-ray diffraction studies          | S9  |
| 3) Thermogravimetric Studies                 | S10 |
| 4) Differential scanning calorimetry Studies | S11 |
| 5) Excitation spectra                        | S15 |
| 6) DC Measurements                           | S18 |
| 7) AC Measurements                           | S21 |

## 1) ESI-MS

ESI-MS analysis of compounds  $[\text{C}_2\text{mim}][\text{Eu}(\text{fod})_4]$  and  $[\text{C}_2\text{mim}][\text{Tb}(\text{fod})_4]$  were presented in ref. 10 and 29 of the main manuscript, respectively. Additionally, we made more 5 for control.

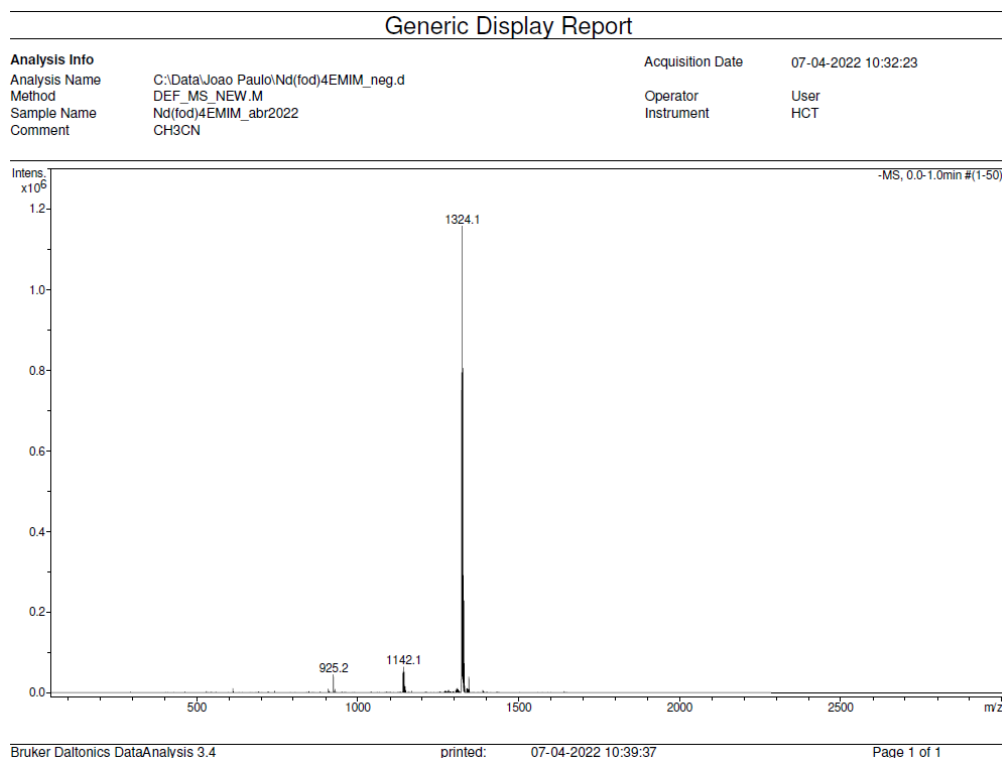

**Figure S1.** ESI-MS analysis of  $[\text{C}_2\text{mim}][\text{Nd}(\text{fod})_4]$  in acetonitrile, negative mode.

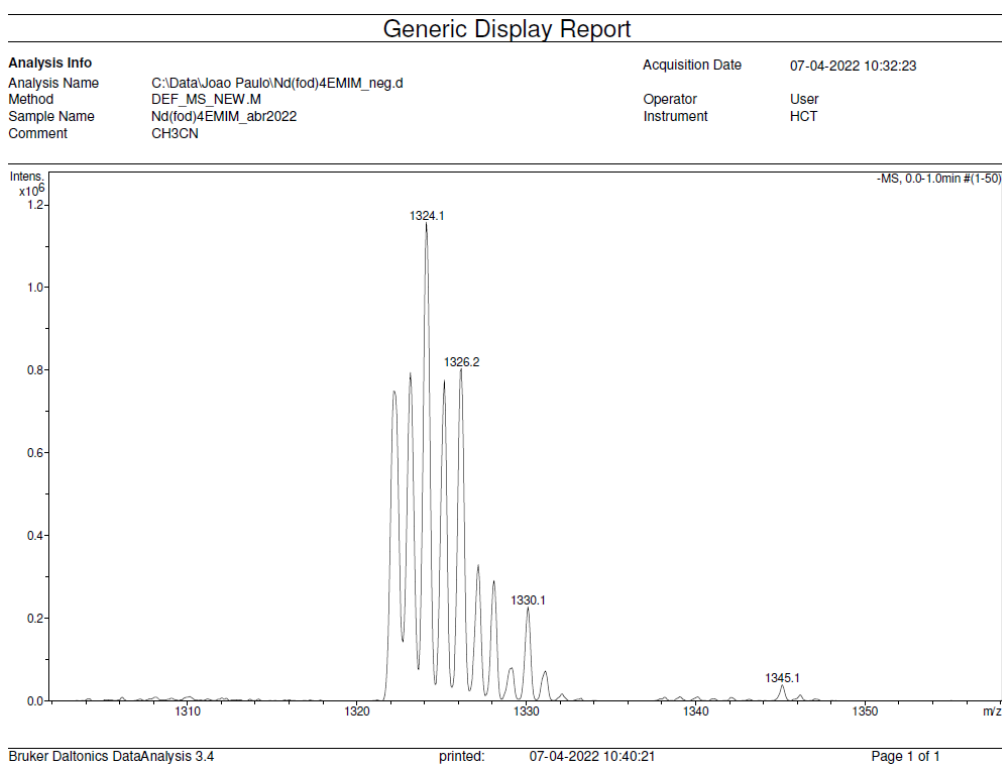

**Figure S2.** Expanded ESI-MS analysis of  $[\text{C}_2\text{mim}][\text{Nd}(\text{fod})_4]$  in acetonitrile, negative mode.

### Generic Display Report

|                      |                                       |                  |                     |
|----------------------|---------------------------------------|------------------|---------------------|
| <b>Analysis Info</b> |                                       | Acquisition Date | 07-04-2022 10:29:49 |
| Analysis Name        | C:\Data\Joao Paulo\Nd(fod)4EMIM_pos.d | Operator         | User                |
| Method               | DEF_MS_NEW.M                          | Instrument       | HCT                 |
| Sample Name          | Nd(fod)4EMIM_abr2022                  |                  |                     |
| Comment              | CH3CN                                 |                  |                     |

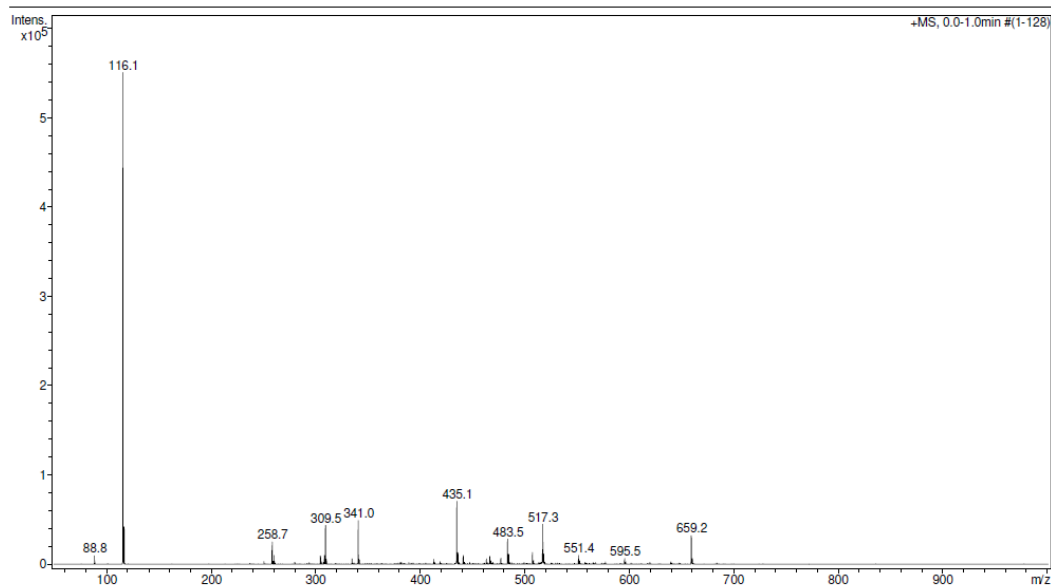

Bruker Daltonics DataAnalysis 3.4

printed: 07-04-2022 10:38:09

Page 1 of 1

**Figure S3.** ESI-MS analysis of [C<sub>2</sub>mim][Nd(fod)<sub>4</sub>] in acetonitrile, positive mode.

### Generic Display Report

|                      |                                       |                  |                     |
|----------------------|---------------------------------------|------------------|---------------------|
| <b>Analysis Info</b> |                                       | Acquisition Date | 07-04-2022 10:42:05 |
| Analysis Name        | C:\Data\Joao Paulo\Sm(fod)4EMIM_neg.d | Operator         | User                |
| Method               | DEF_MS_NEW.M                          | Instrument       | HCT                 |
| Sample Name          | Sm(fod)4EMIM_abr2022                  |                  |                     |
| Comment              | CH3CN                                 |                  |                     |

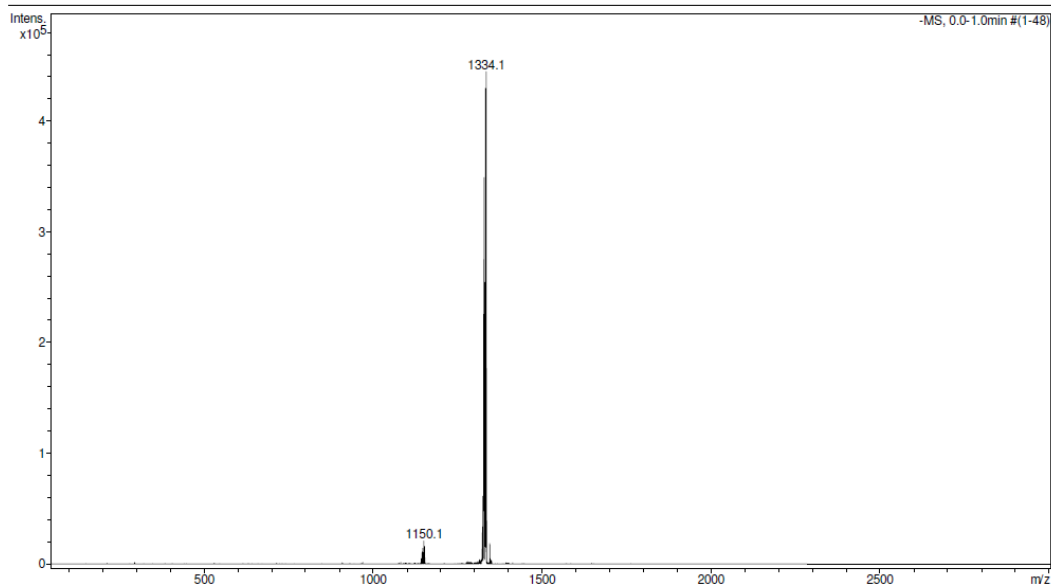

Bruker Daltonics DataAnalysis 3.4

printed: 07-04-2022 10:49:45

Page 1 of 1

**Figure S4.** ESI-MS analysis of [C<sub>2</sub>mim][Sm(fod)<sub>4</sub>] in acetonitrile, negative mode.

### Generic Display Report

|                      |                                       |                  |                     |
|----------------------|---------------------------------------|------------------|---------------------|
| <b>Analysis Info</b> |                                       | Acquisition Date | 07-04-2022 10:42:05 |
| Analysis Name        | C:\Data\Joao Paulo\Sm(fod)4EMIM_neg.d | Operator         | User                |
| Method               | DEF_MS_NEW.M                          | Instrument       | HCT                 |
| Sample Name          | Sm(fod)4EMIM_abr2022                  |                  |                     |
| Comment              | CH3CN                                 |                  |                     |

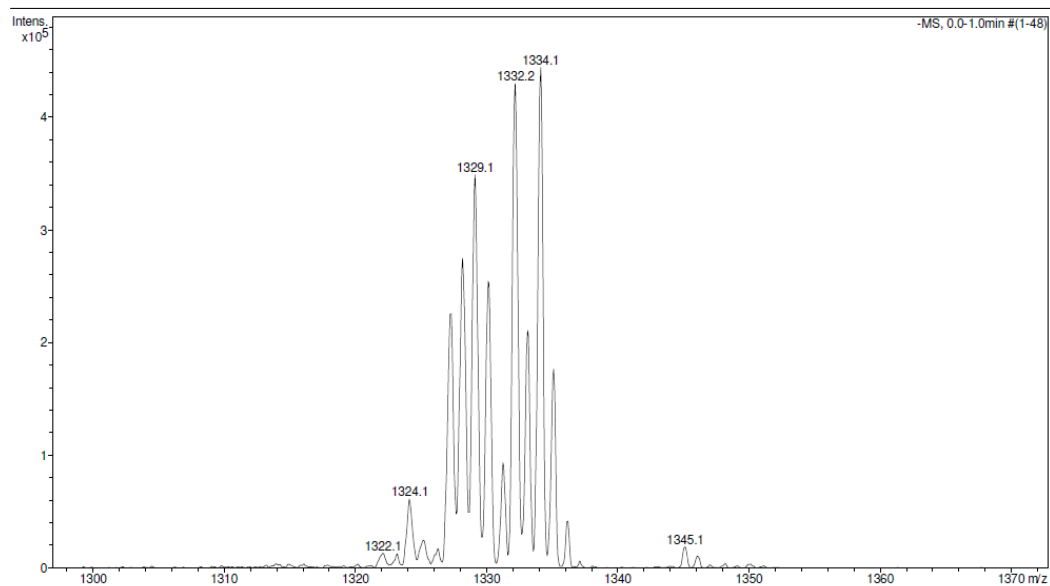

Bruker Daltonics DataAnalysis 3.4 printed: 07-04-2022 10:50:23 Page 1 of 1

**Figure S5.** Expanded ESI-MS analysis of [C<sub>2</sub>mim][Sm(fod)<sub>4</sub>] in acetonitrile, negative mode.

### Generic Display Report

|                      |                                       |                  |                     |
|----------------------|---------------------------------------|------------------|---------------------|
| <b>Analysis Info</b> |                                       | Acquisition Date | 07-04-2022 10:44:22 |
| Analysis Name        | C:\Data\Joao Paulo\Sm(fod)4EMIM_pos.d | Operator         | User                |
| Method               | DEF_MS_NEW.M                          | Instrument       | HCT                 |
| Sample Name          | Sm(fod)4EMIM_abr2022                  |                  |                     |
| Comment              | CH3CN                                 |                  |                     |

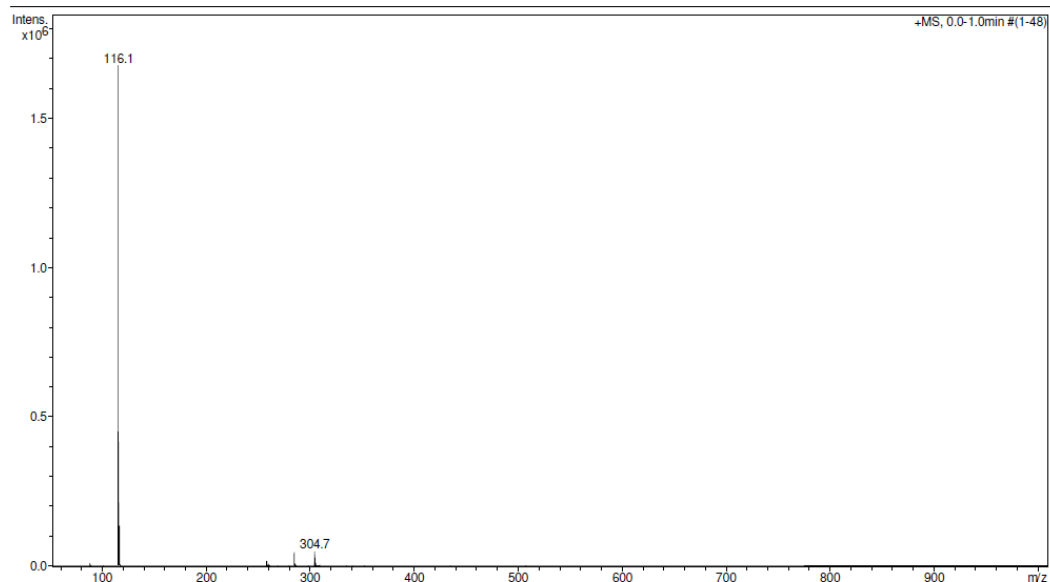

Bruker Daltonics DataAnalysis 3.4 printed: 07-04-2022 10:48:38 Page 1 of 1

**Figure S6.** ESI-MS analysis of [C<sub>2</sub>mim][Sm(fod)<sub>4</sub>] in acetonitrile, positive mode.

### Generic Display Report

**Analysis Info**

Analysis Name C:\Data\Joao Paulo\Ho(fod)4EMIM\_neg.d  
Method DEF\_MS\_NEW.M  
Sample Name Ho(fod)4EMIM\_abr2022  
Comment CH3CN

Acquisition Date 07-04-2022 9:51:28

Operator User  
Instrument HCT

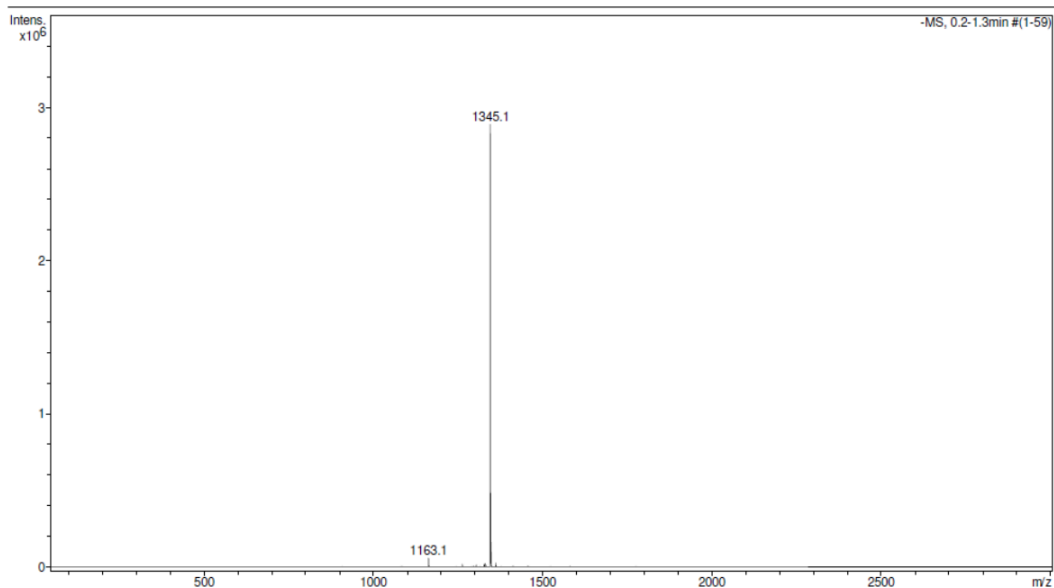

Bruker Daltonics DataAnalysis 3.4

printed: 07-04-2022 10:24:18

Page 1 of 1

**Figure S7.** Expanded ESI-MS analysis of [C<sub>2</sub>mim][Ho(fod)<sub>4</sub>] in acetonitrile, negative mode.

### Generic Display Report

**Analysis Info**

Analysis Name C:\Data\Joao Paulo\Ho(fod)4EMIM\_pos.d  
Method DEF\_MS\_NEW.M  
Sample Name Ho(fod)4EMIM\_abr2022  
Comment CH3CN

Acquisition Date 07-04-2022 10:10:00

Operator User  
Instrument HCT

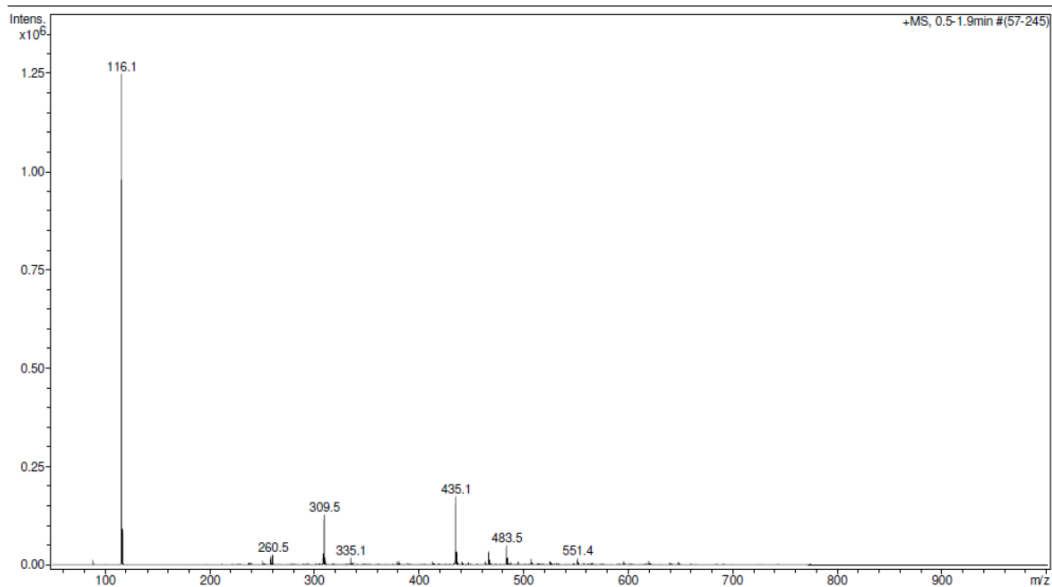

Bruker Daltonics DataAnalysis 3.4

printed: 07-04-2022 10:28:28

Page 1 of 1

**Figure S8.** Expanded ESI-MS analysis of [C<sub>2</sub>mim][Ho(fod)<sub>4</sub>] in acetonitrile, positive mode.

### Generic Display Report

**Analysis Info**

Analysis Name C:\Data\Joao Paulo\Er(fod)4EMIM\_neg.d  
Method DEF\_MS\_NEW.M  
Sample Name Er(fod)4EMIM\_abr2022  
Comment CH3CN

Acquisition Date 07-04-2022 10:58:16

Operator User  
Instrument HCT

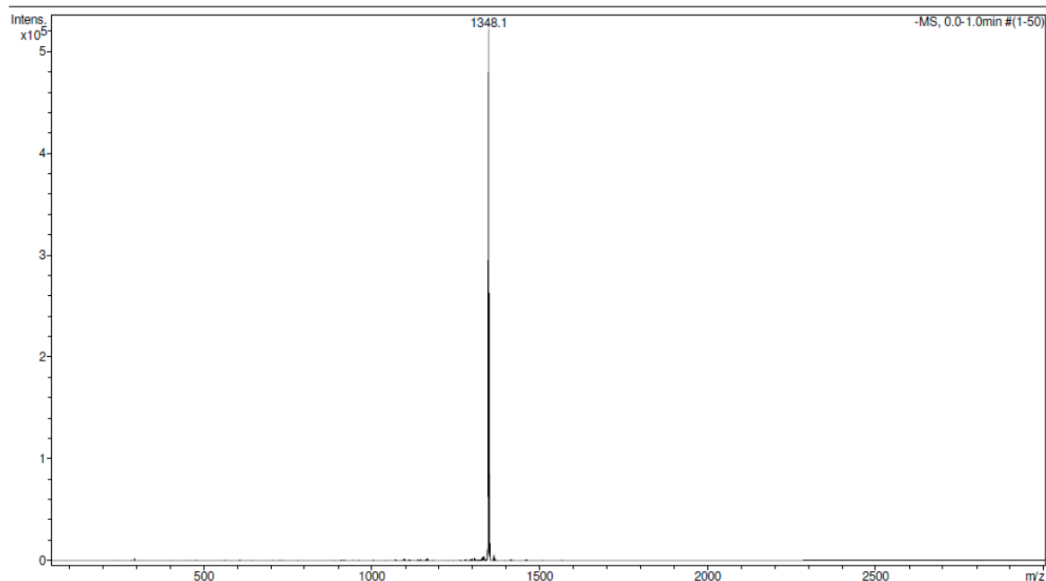

Bruker Daltonics DataAnalysis 3.4

printed: 07-04-2022 11:08:03

Page 1 of 1

**Figure S9.** ESI-MS analysis of  $[\text{C}_2\text{mim}][\text{Er}(\text{fod})_4]$  in acetonitrile, negative mode.

### Generic Display Report

**Analysis Info**

Analysis Name C:\Data\Joao Paulo\Er(fod)4EMIM\_neg.d  
Method DEF\_MS\_NEW.M  
Sample Name Er(fod)4EMIM\_abr2022  
Comment CH3CN

Acquisition Date 07-04-2022 10:58:16

Operator User  
Instrument HCT

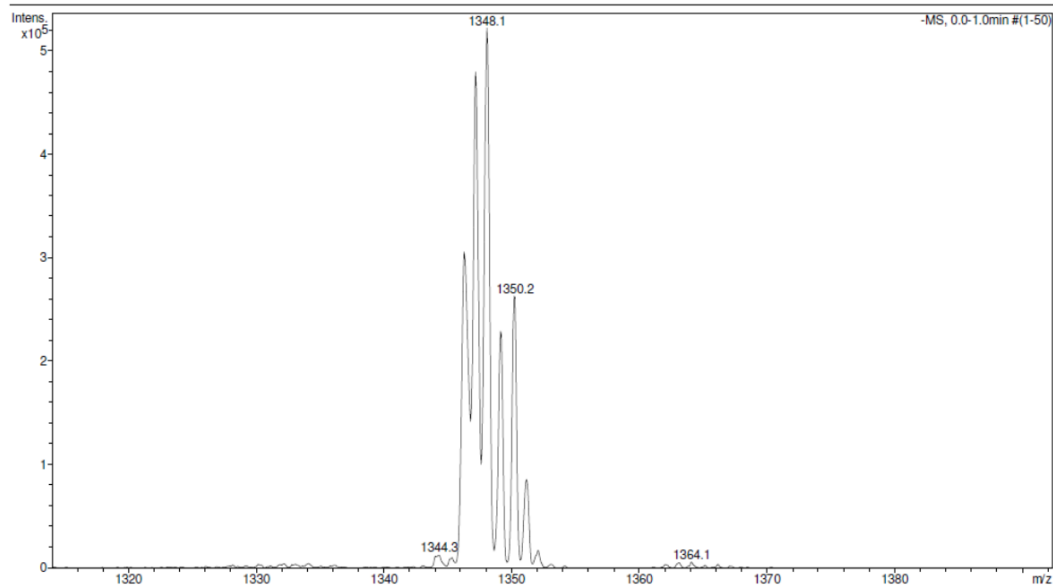

Bruker Daltonics DataAnalysis 3.4

printed: 07-04-2022 11:08:34

Page 1 of 1

**Figure S10.** Expanded ESI-MS analysis of  $[\text{C}_2\text{mim}][\text{Er}(\text{fod})_4]$  in acetonitrile, negative mode.

## Generic Display Report

### Analysis Info

Analysis Name C:\Data\Joao Paulo\Er(fod)4EMIM\_pos.d  
Method DEF\_MS\_NEW.M  
Sample Name Er(fod)4EMIM\_abr2022  
Comment CH3CN

Acquisition Date 07-04-2022 11:00:08

Operator User  
Instrument HCT

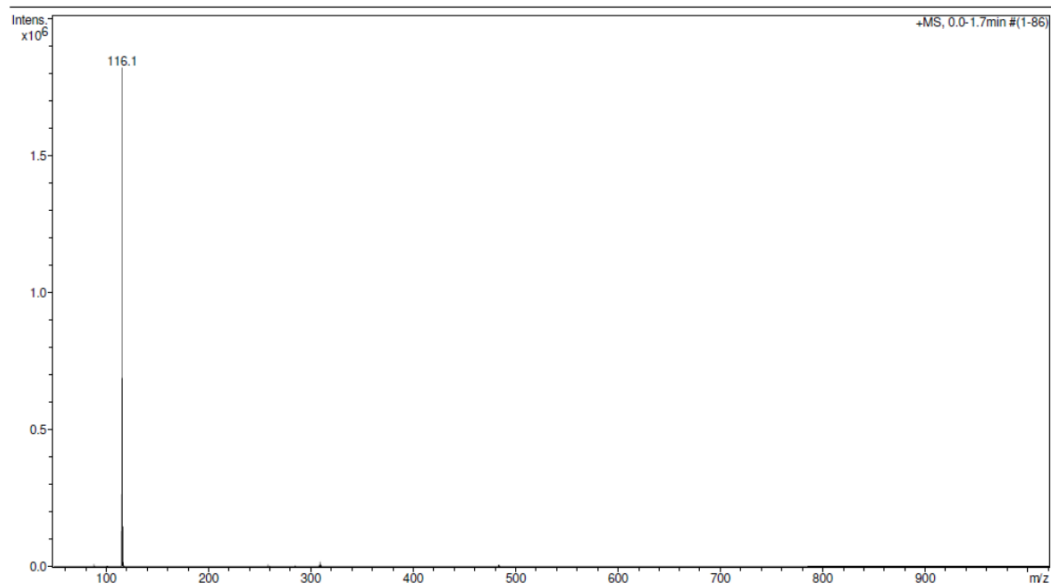

Bruker Daltonics DataAnalysis 3.4

printed: 07-04-2022 11:07:07

Page 1 of 1

**Figure S11.** ESI-MS analysis of [C<sub>2</sub>mim][Er(fod)<sub>4</sub>] in acetonitrile, positive mode.



## 1) FT-IR

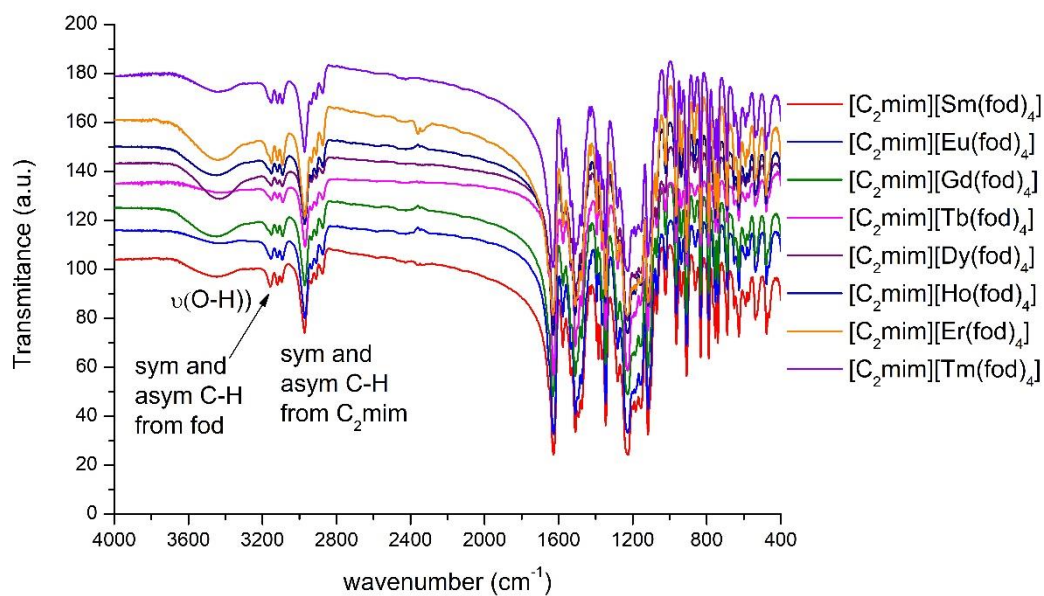

Figure S12. FT-IR spectra for compounds 2-9 in the 400 - 4000  $\text{cm}^{-1}$  range.

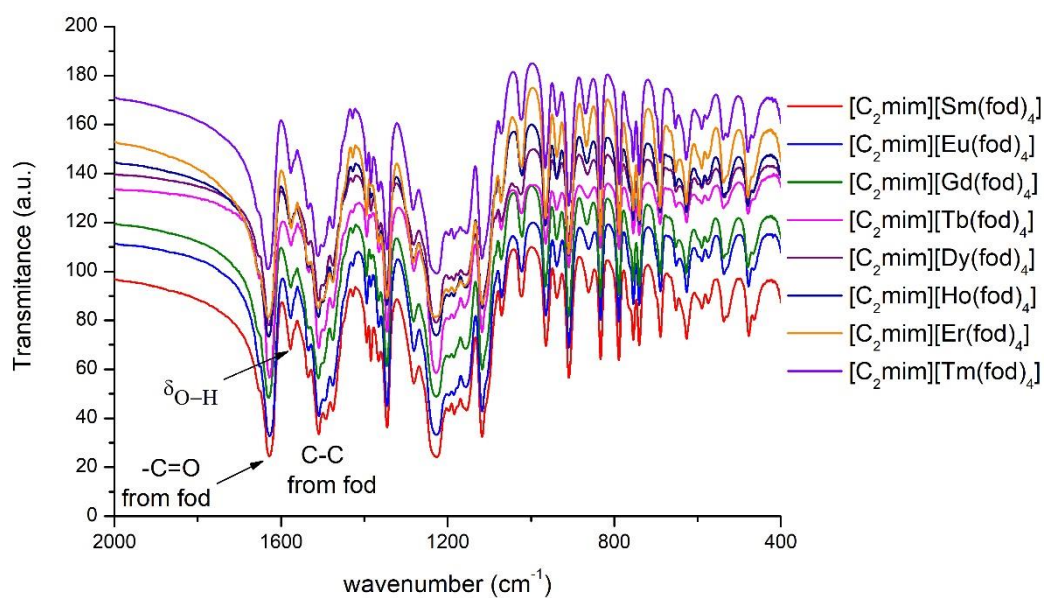

Figure S13. FT-IR spectra for compounds 2-9 in the 400 - 2000  $\text{cm}^{-1}$  range.

## 2) Powder X-ray diffraction studies

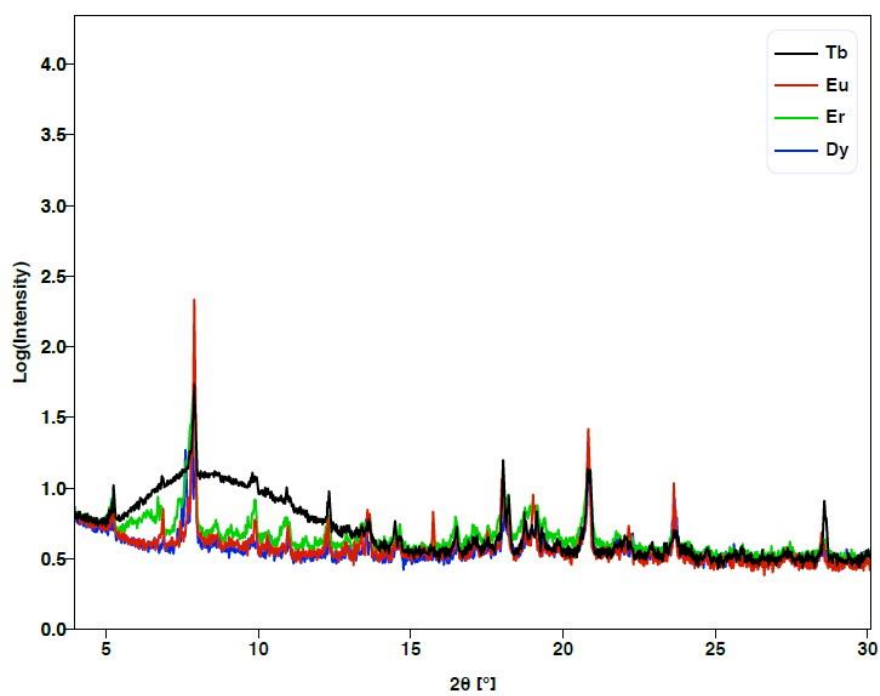

**Figure S14.** Powder X-ray diffraction patterns made with crystals of the Eu (3), Tb (5), Dy (6) and Er (8) compounds.

### 3) Thermogravimetry

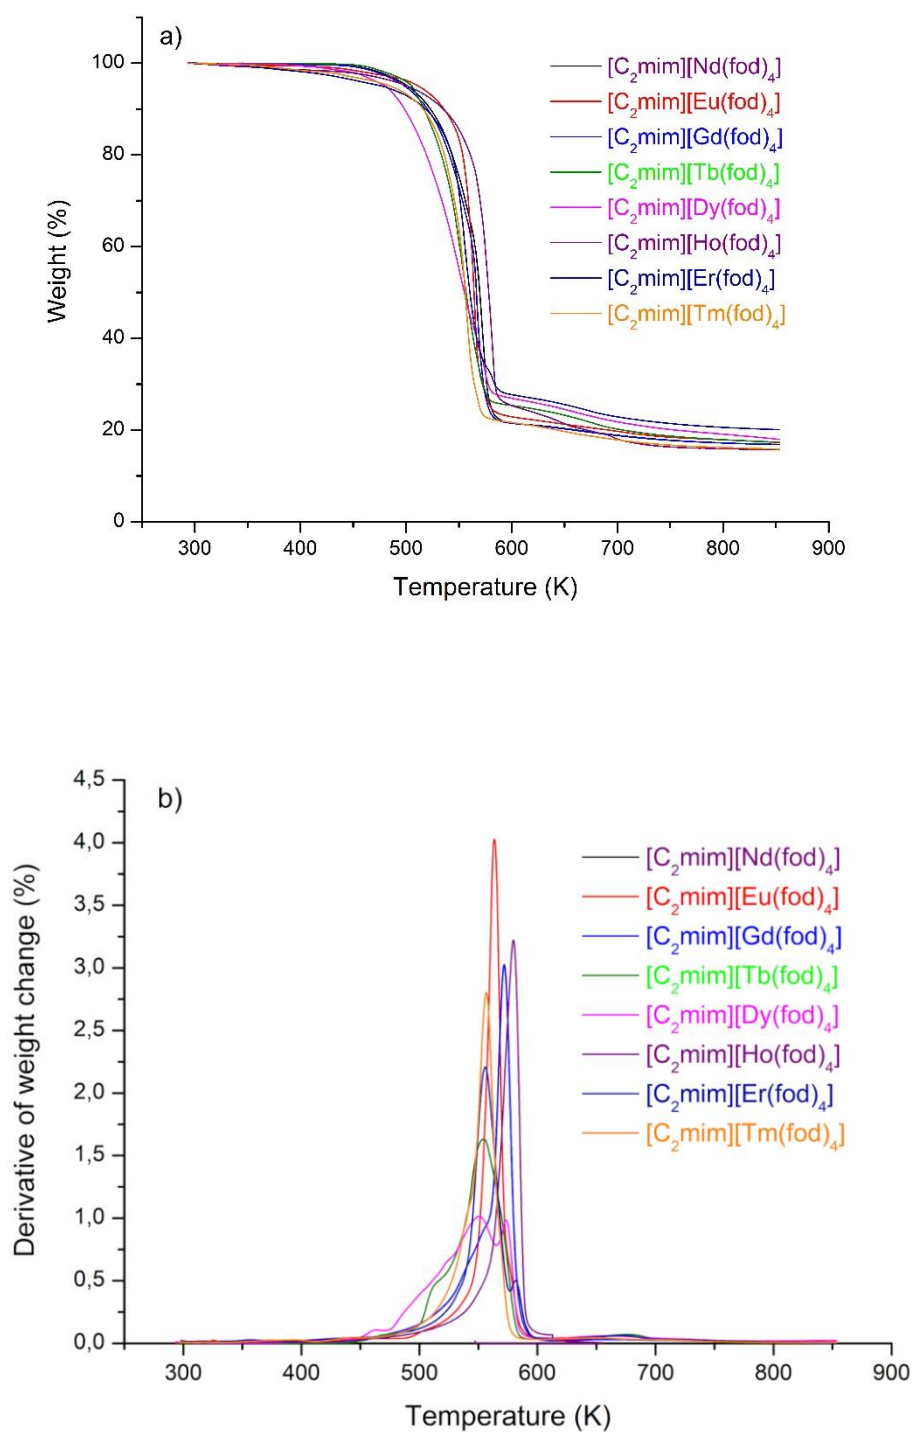

**Figure S15.** (a) Thermogravimetric analysis for compounds **1,3-9** between 293 and 858 K and (b) the derivative of the weight change of the Thermogravimetric results.

#### 4) Differential scanning calorimetry Studies

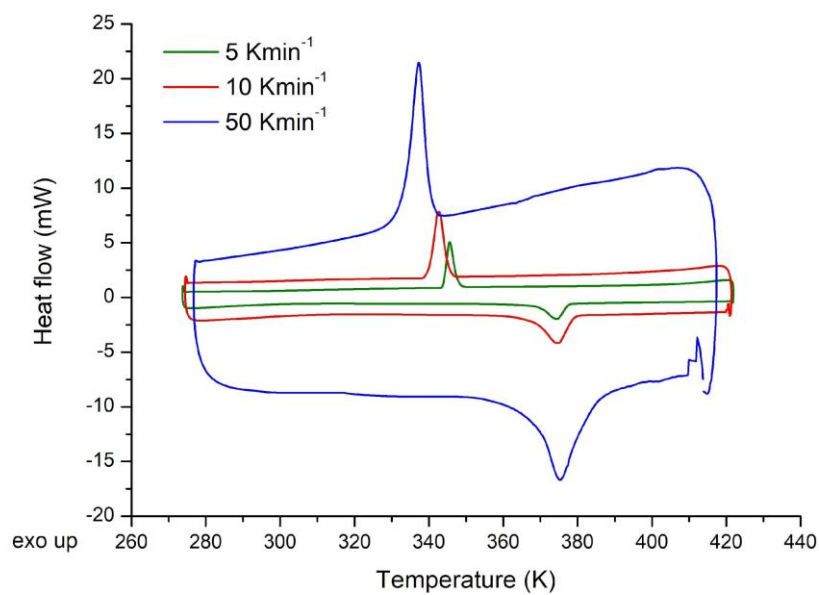

**Figure S16.** DSC analysis for the [C<sub>2</sub>mim][Nd(fod)<sub>4</sub>] (1) compound in the range 273-423 K with a scanning rate of 5 Kmin<sup>-1</sup> (green), 10 Kmin<sup>-1</sup> (red) and 50 Kmin<sup>-1</sup> (blue).

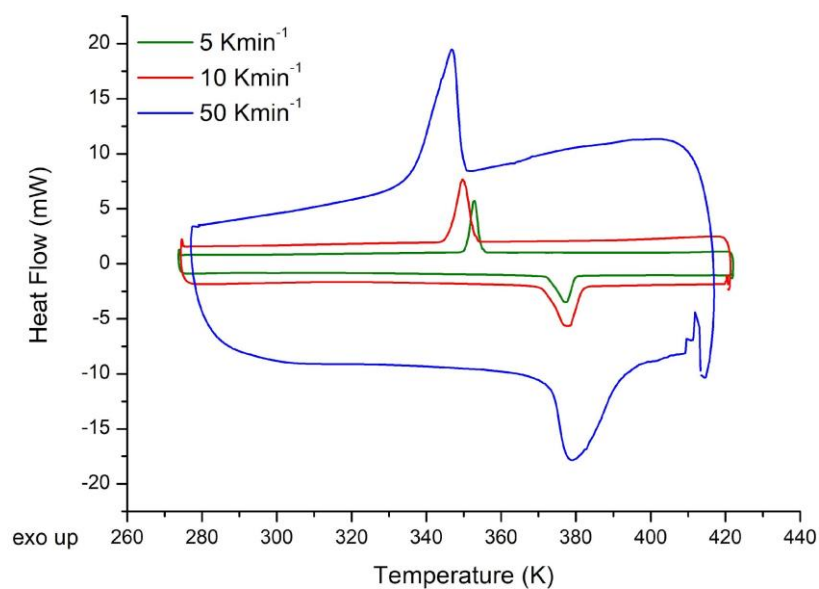

**Figure S17.** DSC analysis for the [C<sub>2</sub>mim][Sm(fod)<sub>4</sub>] (2) compound in the range 273-423 K with a scanning rate of 5 Kmin<sup>-1</sup> (green), 10 Kmin<sup>-1</sup> (red) and 50 Kmin<sup>-1</sup> (blue).

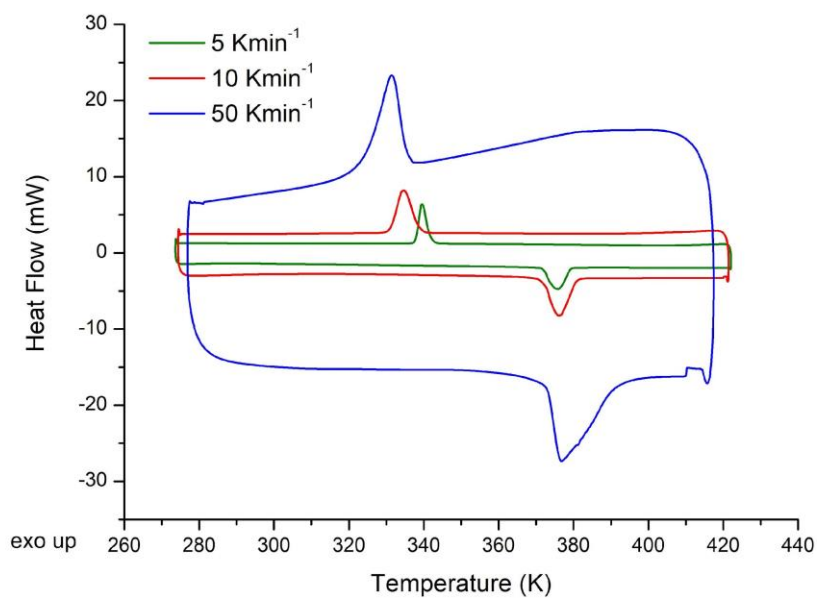

**Figure S18.** DSC analysis for the [C<sub>2</sub>mim][Eu(fod)<sub>4</sub>] (**3**) compound in the range 273-423 K with a scanning rate of 5 Kmin<sup>-1</sup> (green), 10 Kmin<sup>-1</sup> (red) and 50 Kmin<sup>-1</sup> (blue).

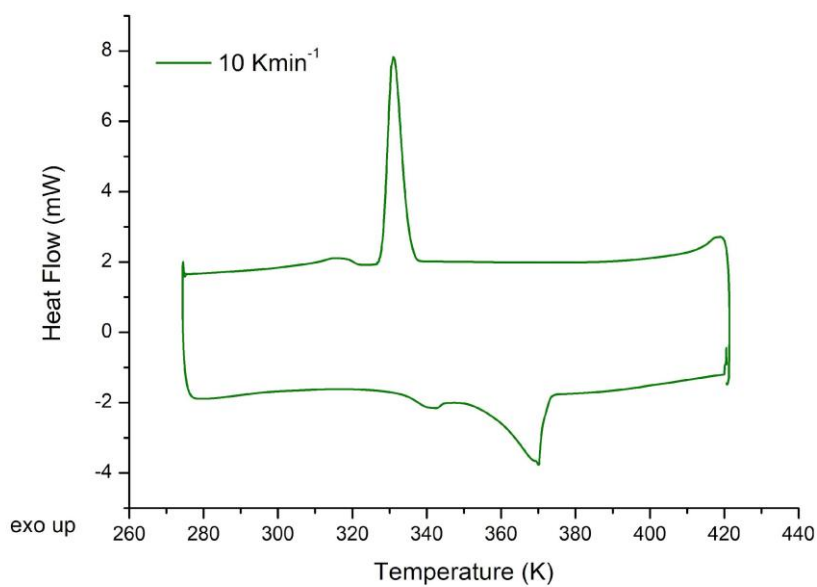

**Figure S19.** DSC analysis for the [C<sub>2</sub>mim][Gd(fod)<sub>4</sub>] (**4**) compound in the range 273-423 K with a scanning rate of 10 Kmin<sup>-1</sup>.

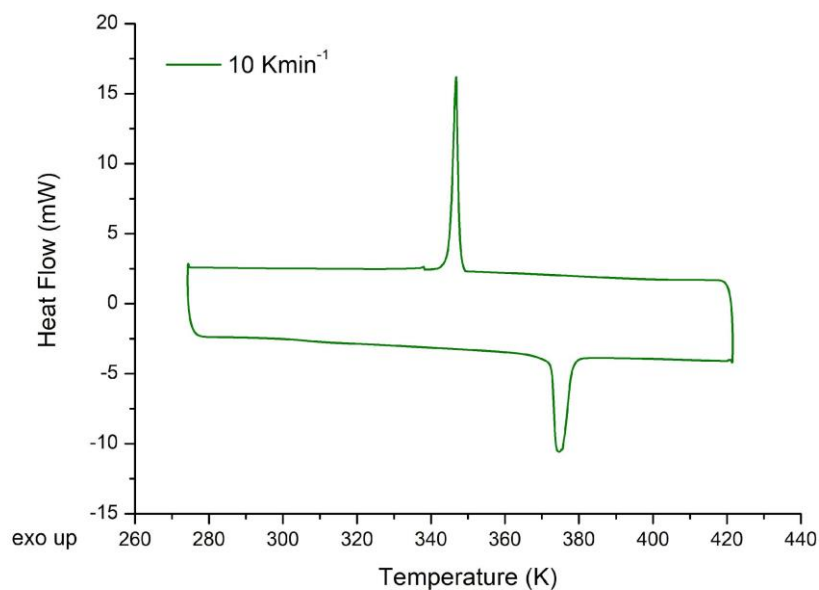

**Figure S20.** DSC analysis for the [C<sub>2</sub>mim][Tb(fod)<sub>4</sub>] (5) compound in the range 273-423 K with a scanning rate of 10 Kmin<sup>-1</sup>.

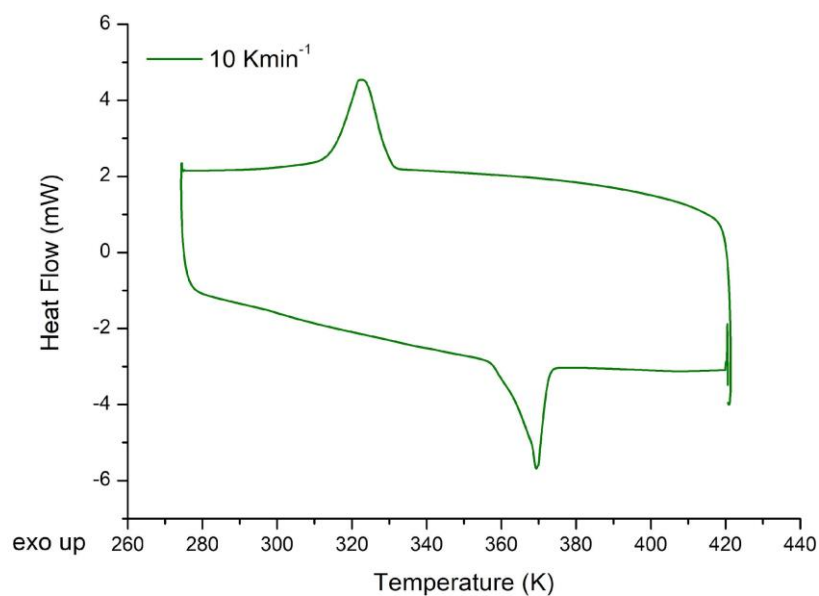

**Figure S21.** DSC analysis for the [C<sub>2</sub>mim][Ho(fod)<sub>4</sub>] (7) compound in the range 273-423 K with a scanning rate of 10 Kmin<sup>-1</sup>.

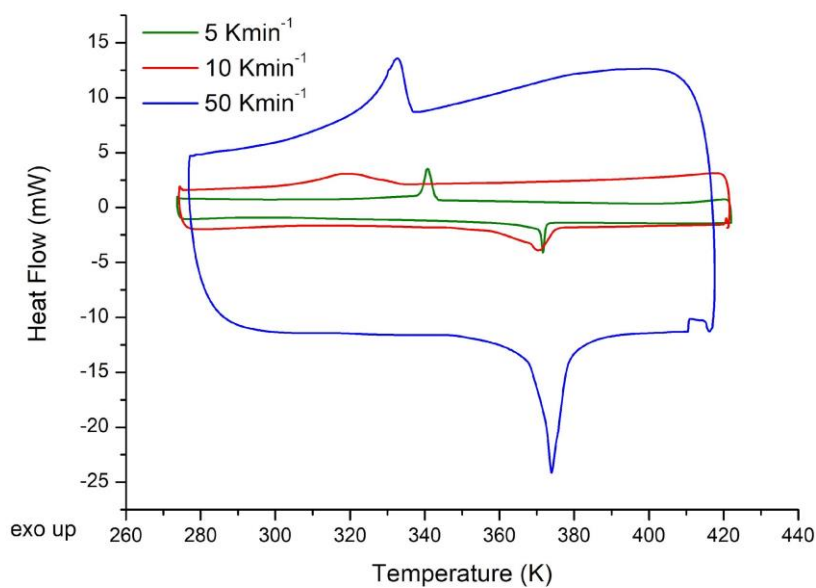

**Figure S22.** DSC analysis for the [C<sub>2</sub>mim][Er(fod)<sub>4</sub>] (8) compound in the range 273-423 K with a scanning rate of 5 Kmin<sup>-1</sup> (green), 10 Kmin<sup>-1</sup> (red) and 50 Kmin<sup>-1</sup> (blue).

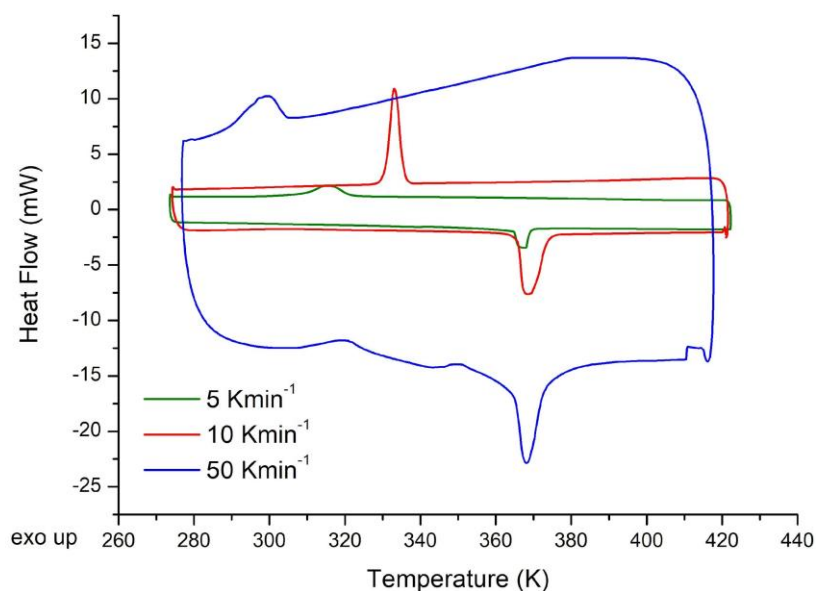

**Figure S23.** DSC analysis for the [C<sub>2</sub>mim][Tm(fod)<sub>4</sub>] (9) compound in the range 273-423 K with a scanning rate of 5 Kmin<sup>-1</sup> (green), 10 Kmin<sup>-1</sup> (red) and 50 Kmin<sup>-1</sup> (blue).

## 5) Excitation spectra

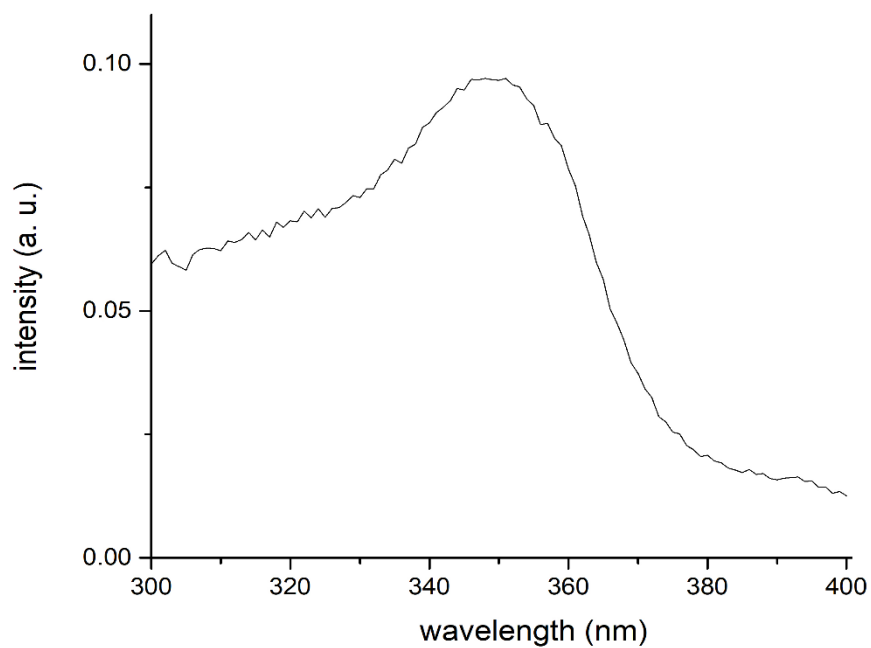

**Figure S24.** Excitation spectrum of the [C<sub>2</sub>mim][Nd(fod)<sub>4</sub>] (1) compound.

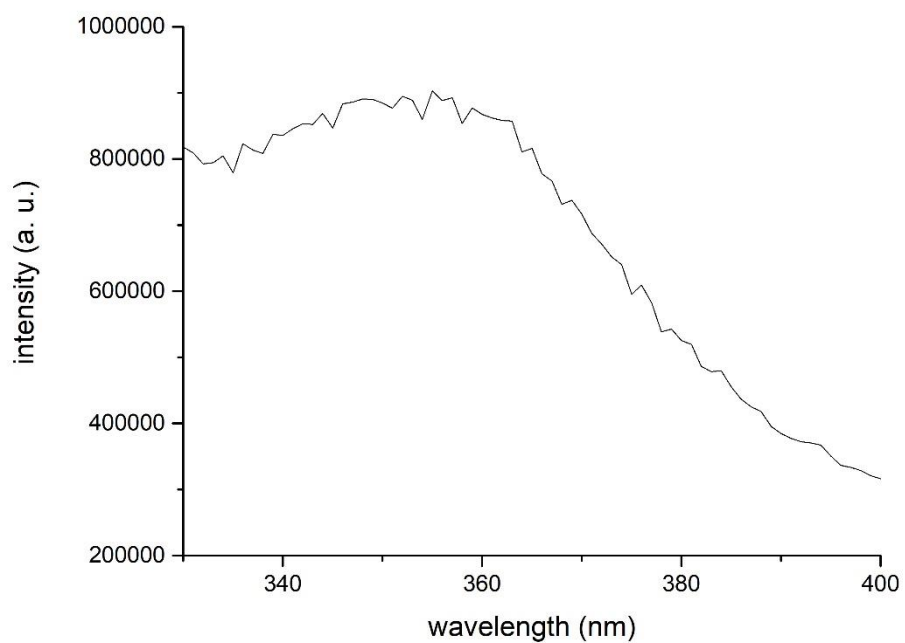

**Figure S25.** Excitation spectrum of the [C<sub>2</sub>mim][Eu(fod)<sub>4</sub>] (3) compound.



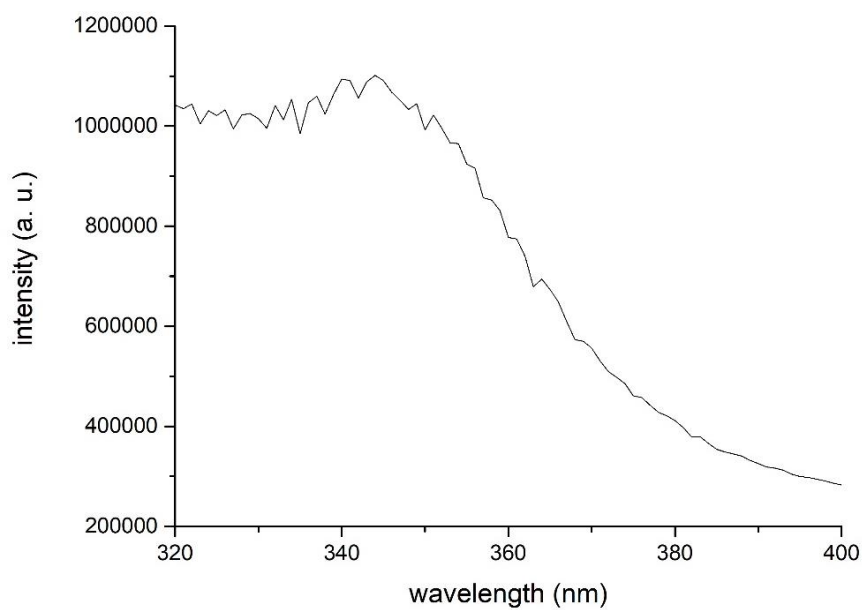

**Figure S26.** Excitation spectrum of the [C<sub>2</sub>mim][Tb(fod)<sub>4</sub>] (5) compound.

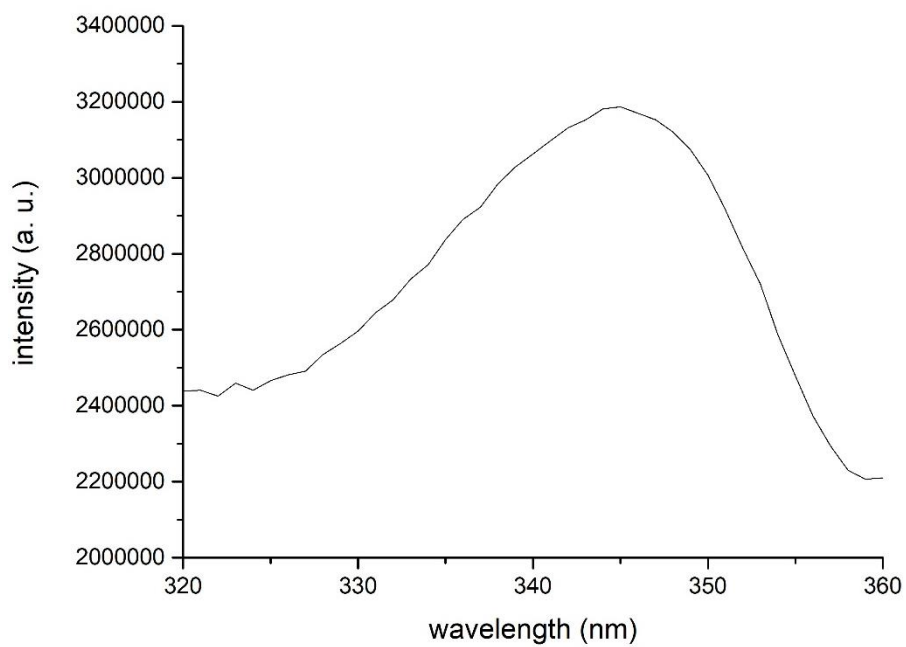

**Figure S27.** Excitation spectrum of the [C<sub>2</sub>mim][Dy(fod)<sub>4</sub>] (6) compound.

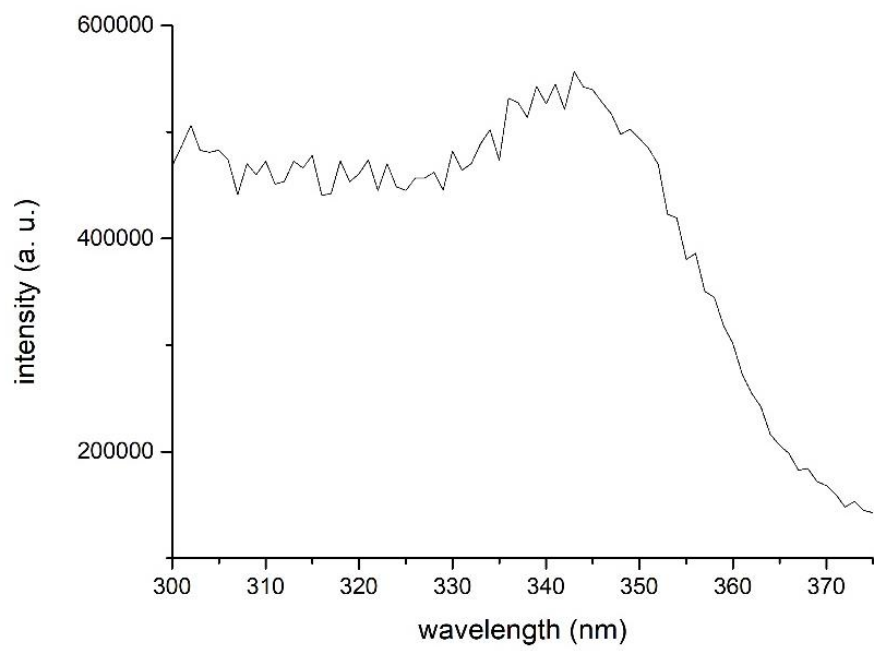

**Figure S28.** Excitation spectrum of the [C<sub>2</sub>mim][Tm(fod)<sub>4</sub>] (**9**) compound.

## 6) DC Measurements

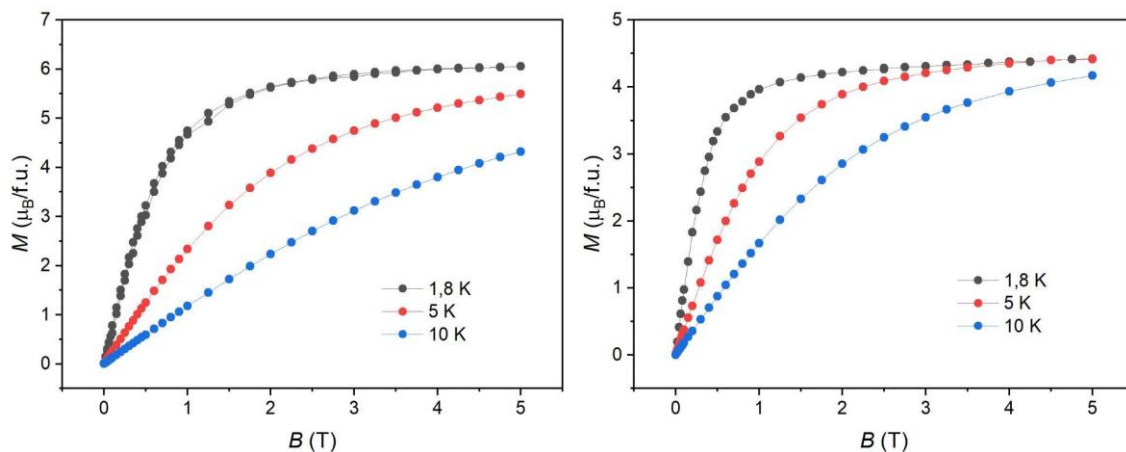

**Figure S29.** Field dependence of the magnetization at several temperatures for (left)  $[C_2mim][Gd(fod)_4]$  (4) and (right)  $[C_2mim][Tb(fod)_4]$  (5).

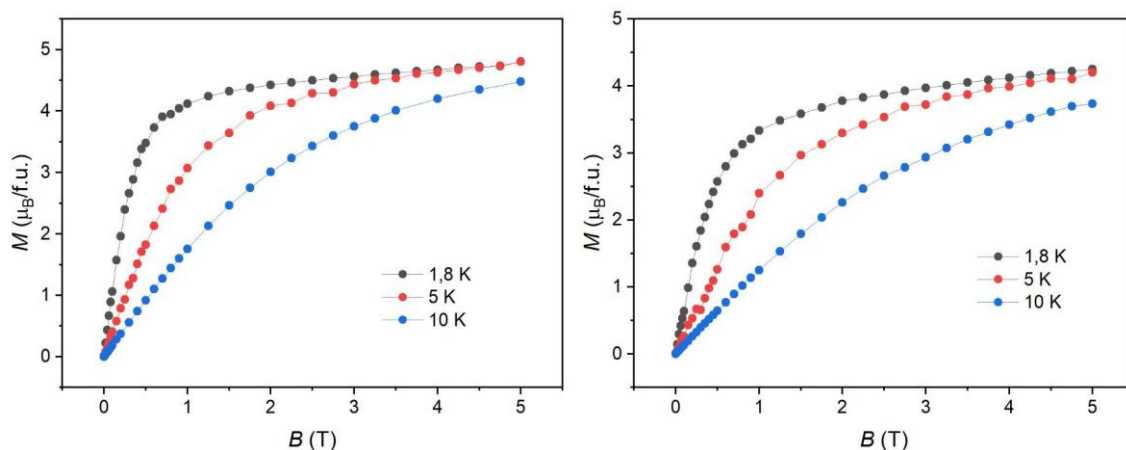

**Figure S30.** Field dependence of the magnetization at several temperatures for (left)  $[C_2mim][Dy(fod)_4]$  (6) and (right)  $[C_2mim][Ho(fod)_4]$  (7).

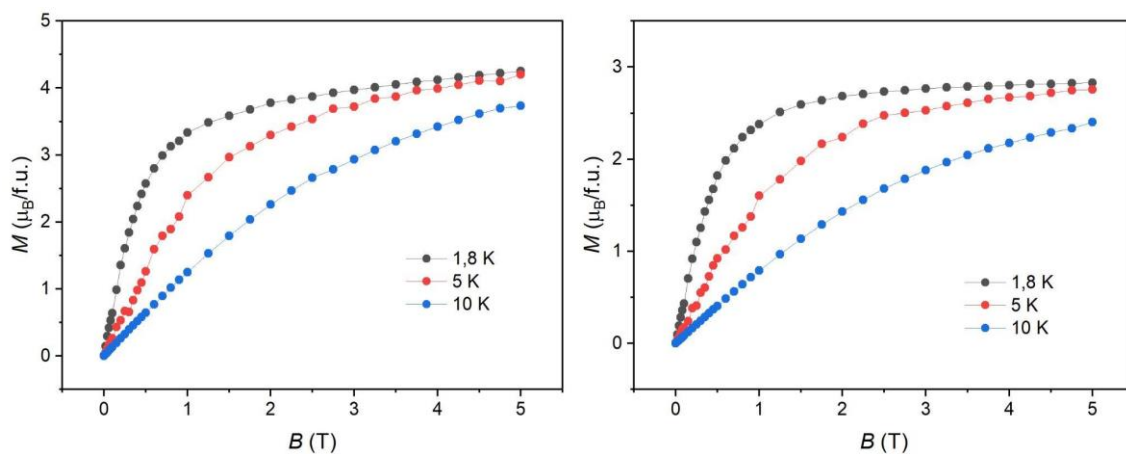

**Figure S31.** Field dependence of the magnetization at several temperatures for (left)  $[C_2mim][Er(fod)_4]$  (8) and (right)  $[C_2mim][Tm(fod)_4]$  (9).

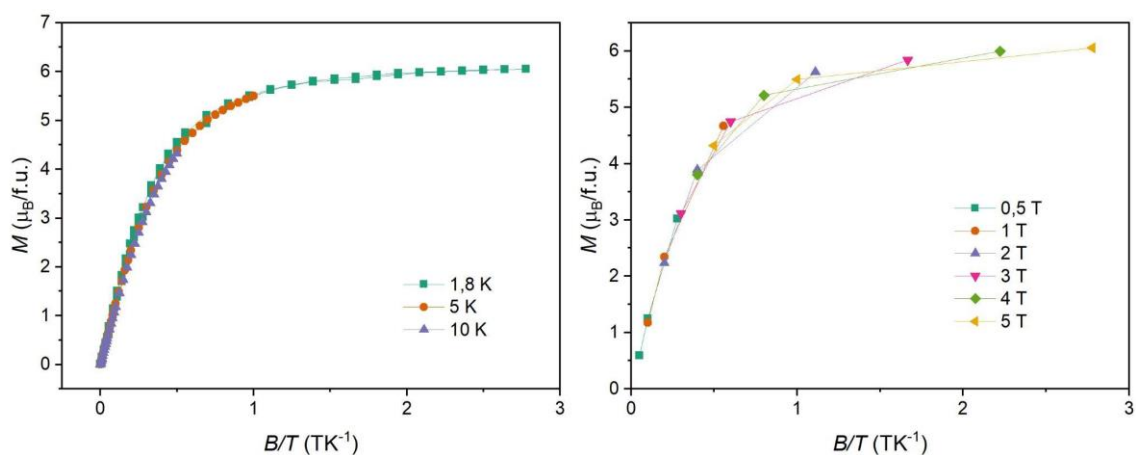

**Figure S32.** Reduced magnetization plots for  $[\text{C}_2\text{mim}][\text{Gd}(\text{fod})_4]$  (4).

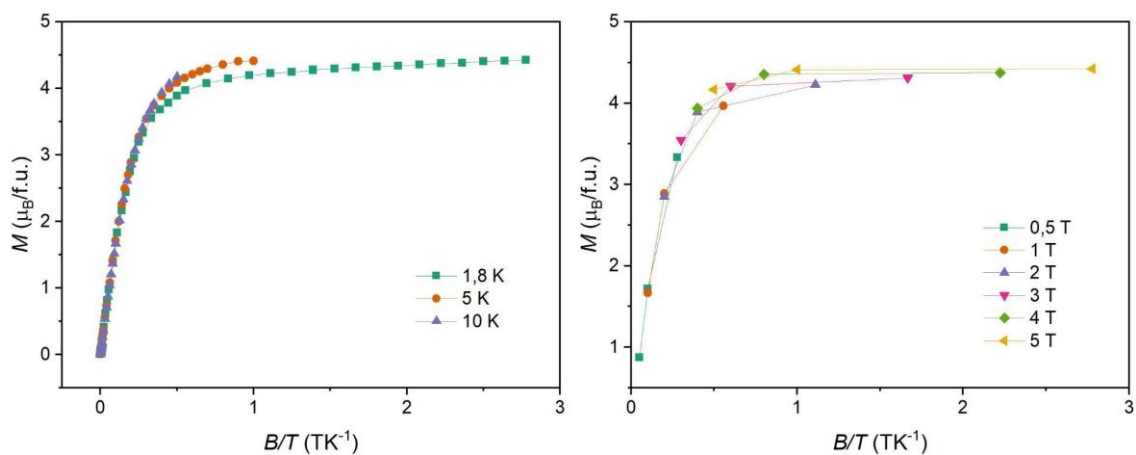

**Figure S33.** Reduced magnetization plots for  $[\text{C}_2\text{mim}][\text{Tb}(\text{fod})_4]$  (5).

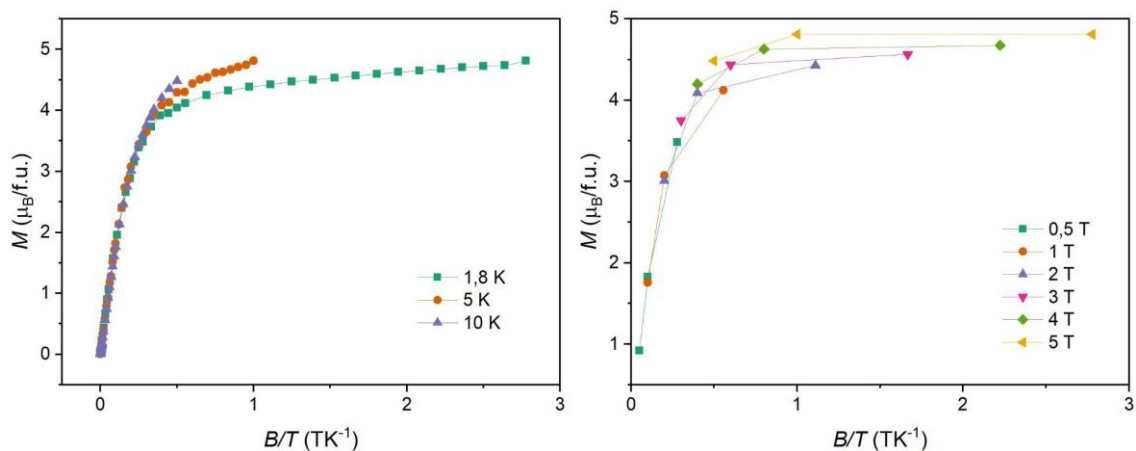

**Figure S34.** Reduced magnetization plots for  $[\text{C}_2\text{mim}][\text{Dy}(\text{fod})_4]$  (6).

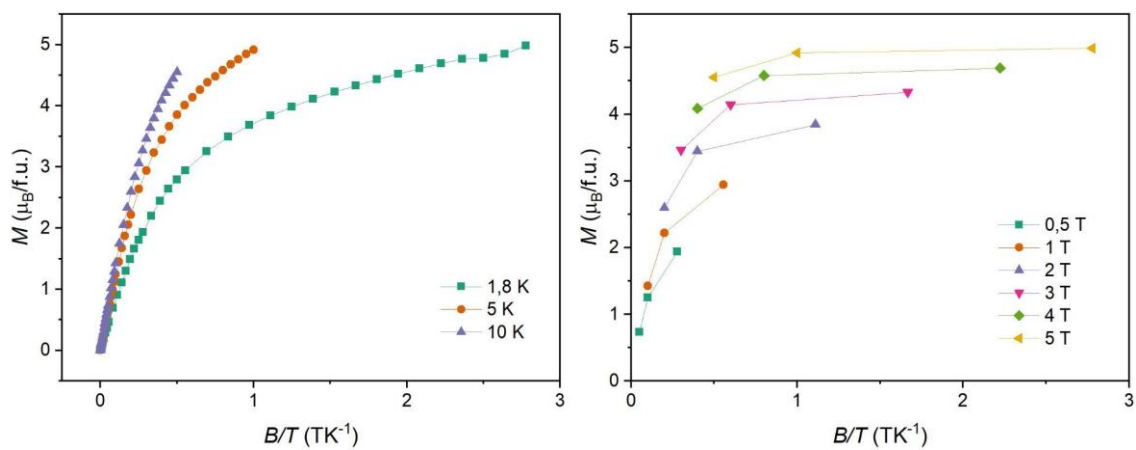

Figure S35. Reduced magnetization plots for  $[\text{C}_2\text{mim}][\text{Ho}(\text{fod})_4]$  (7).

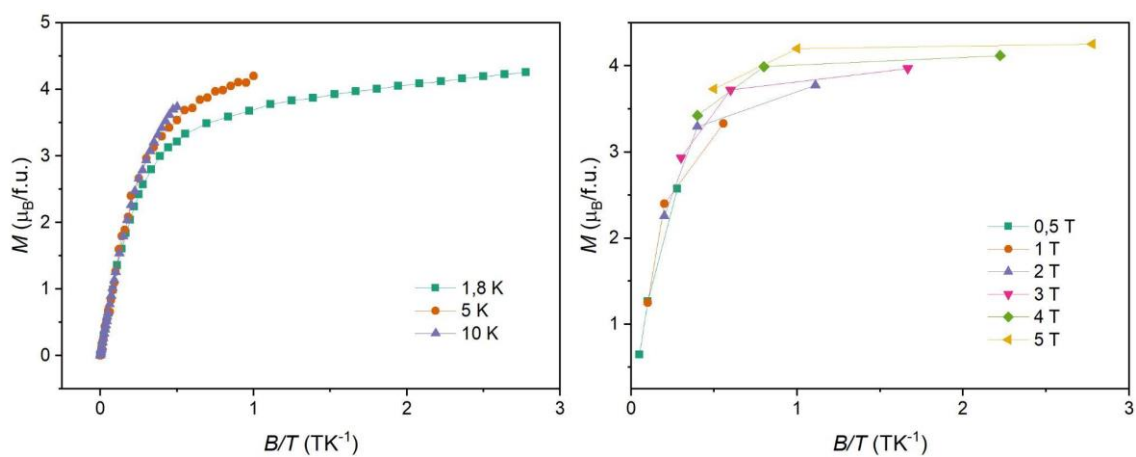

Figure S36. Reduced magnetization plots for  $[\text{C}_2\text{mim}][\text{Er}(\text{fod})_4]$  (8).

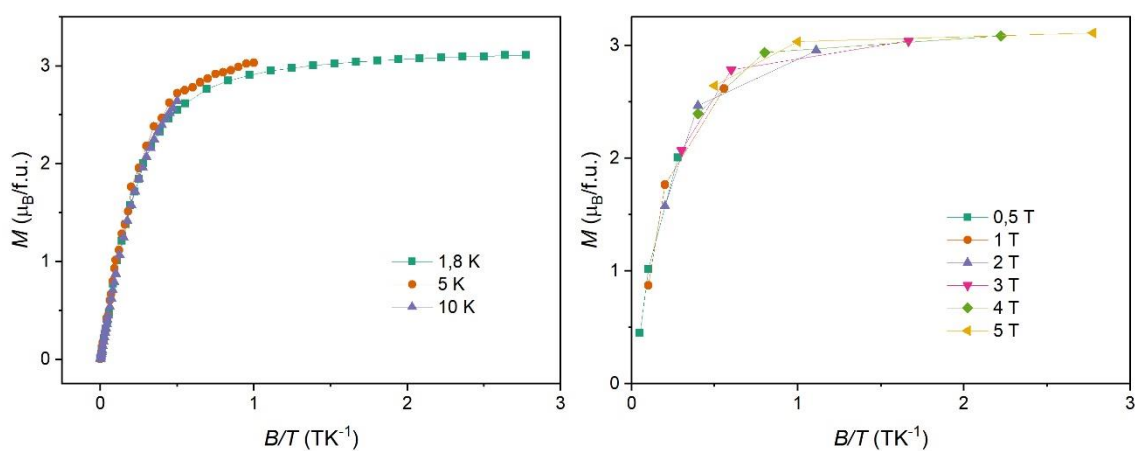

Figure S37. Reduced magnetization plots for  $[\text{C}_2\text{mim}][\text{Tm}(\text{fod})_4]$  (9).

## 7) AC Measurements

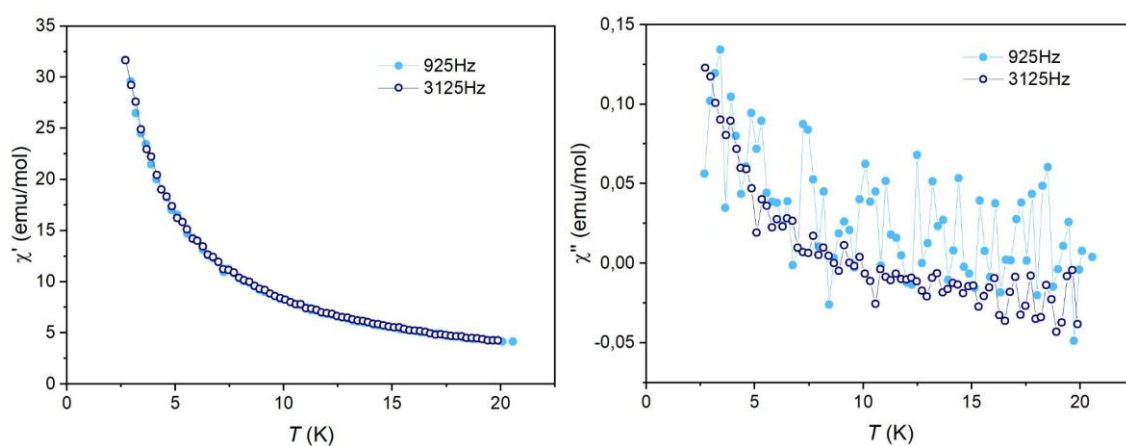

**Figure S38.** Temperature dependence of the (left) real,  $\chi'$ , and (right) imaginary,  $\chi''$ , components of the AC susceptibility for  $[\text{C}_2\text{mim}][\text{Gd}(\text{fod})_4]$  (**4**), collected at different AC frequencies under a static field of  $H_{\text{DC}} = 0$  G.  $H_{\text{AC}} = 1$  Oe (925 Hz), 3 Oe (3125 Hz).

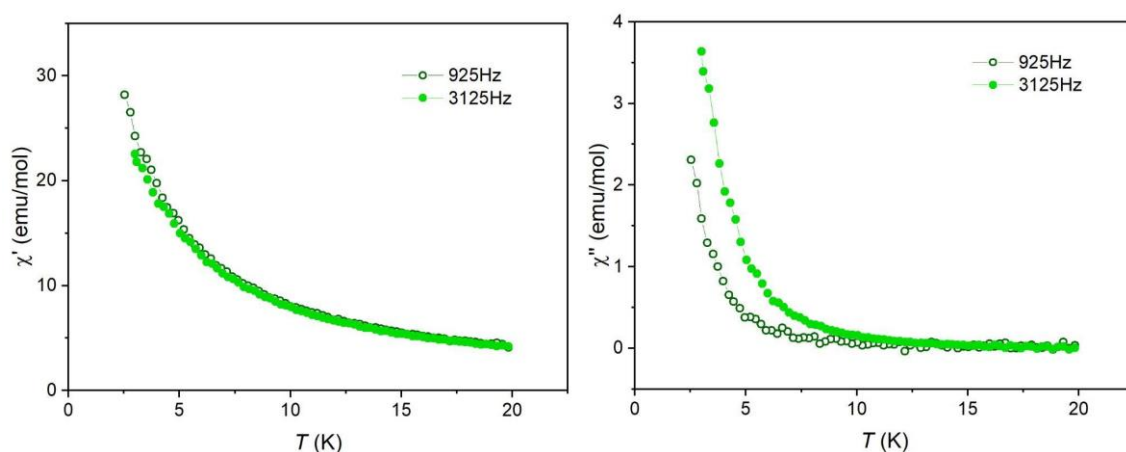

**Figure S39.** Temperature dependence of the (left) real,  $\chi'$ , and (right) imaginary,  $\chi''$ , components of the AC susceptibility for  $[\text{C}_2\text{mim}][\text{Gd}(\text{fod})_4]$  (**4**), collected at different AC frequencies under a static field of  $H_{\text{DC}} = 1500$  G.  $H_{\text{AC}} = 1$  Oe (925 Hz), 3 Oe (3125 Hz).

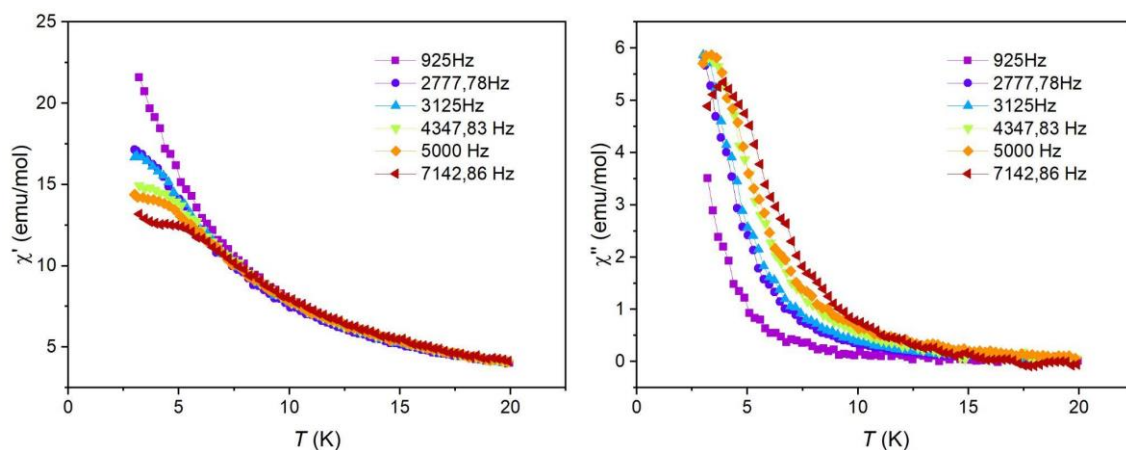

**Figure S40.** Temperature dependence of the (left) real,  $\chi'$ , and (right) imaginary,  $\chi''$ , components of the AC susceptibility for  $[\text{C}_2\text{mim}][\text{Gd}(\text{fod})_4]$  (**4**), collected at different AC frequencies under a static field of  $H_{\text{DC}} = 2500$  G.  $H_{\text{AC}} = 1$  Oe (925 Hz), 3 Oe (remaining frequencies).

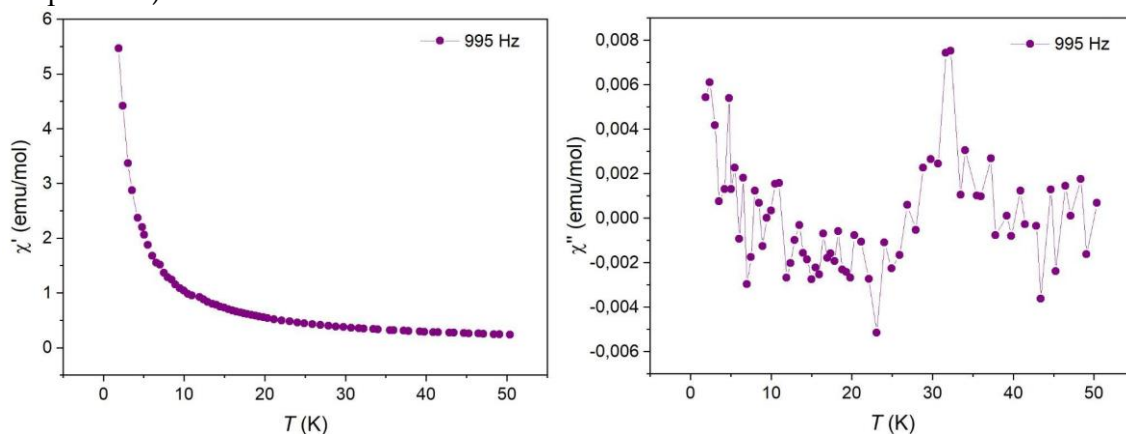

**Figure S41.** Temperature dependence of the (left) real,  $\chi'$ , and (right) imaginary,  $\chi''$ , components of the AC susceptibility for  $[\text{C}_2\text{mim}][\text{Tb}(\text{fod})_4]$  (**5**), collected at AC frequency of 995 Hz under a static field of  $H_{\text{DC}} = 0$  G.  $H_{\text{AC}} = 10$  Oe.

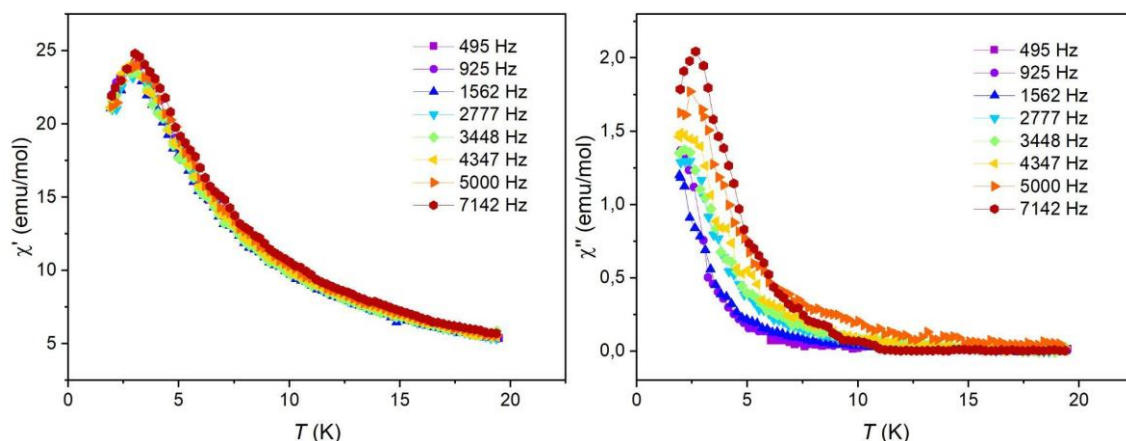

**Figure S42.** Temperature dependence of the (left) real,  $\chi'$ , and (right) imaginary,  $\chi''$ , components of the AC susceptibility for  $[\text{C}_2\text{mim}][\text{Tb}(\text{fod})_4]$  (**5**), collected at different AC frequencies under a static field of  $H_{\text{DC}} = 2500$  G.  $H_{\text{AC}} = 3$  Oe.

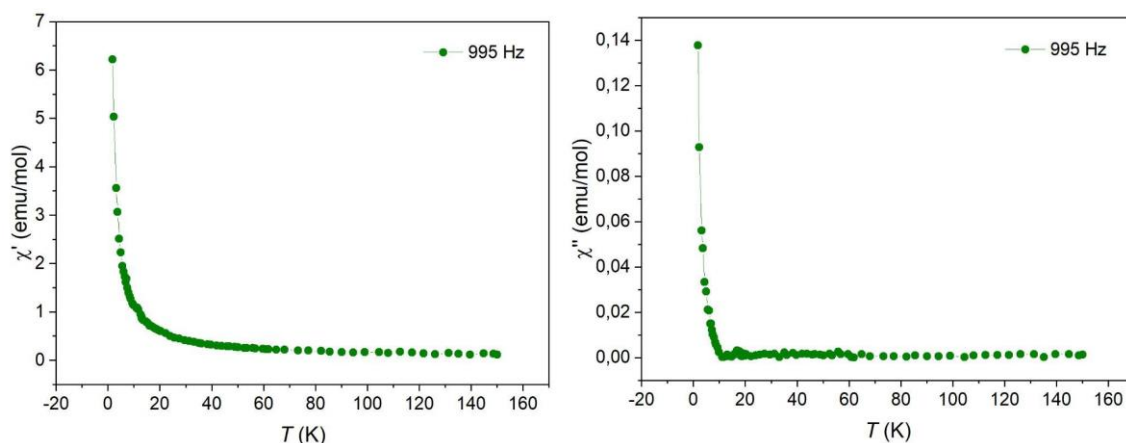

**Figure S43.** Temperature dependence of the (left) real,  $\chi'$ , and (right) imaginary,  $\chi''$ , components of the AC susceptibility for  $[\text{C}_2\text{mim}][\text{Dy}(\text{fod})_4]$  (**6**), collected at AC frequency of 995 Hz under a static field of  $H_{\text{DC}} = 0$  G.  $H_{\text{AC}} = 10$  Oe.

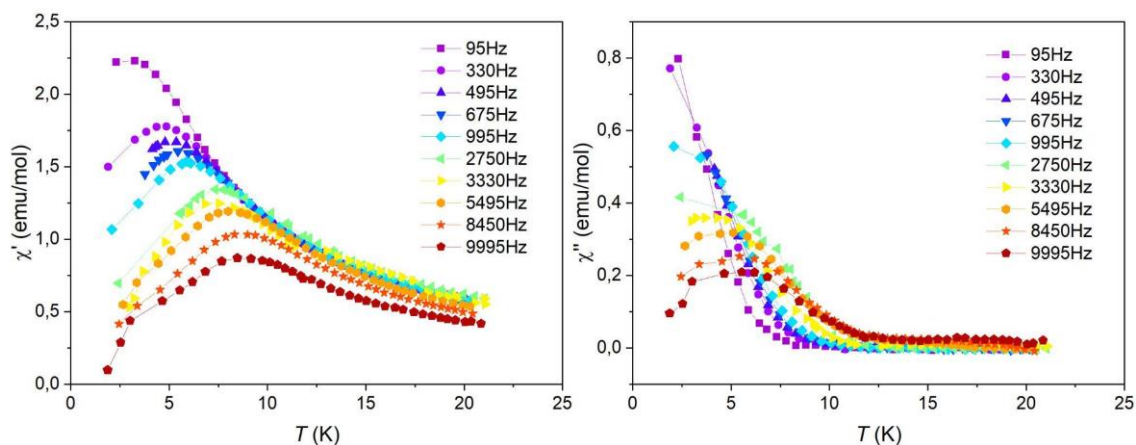

**Figure S44.** Temperature dependence of the (left) real,  $\chi'$ , and (right) imaginary,  $\chi''$ , components of the AC susceptibility for  $[\text{C}_2\text{mim}][\text{Dy}(\text{fod})_4]$  (**6**), collected at several AC frequencies under a static field of  $H_{\text{DC}} = 1500$  G.  $H_{\text{AC}} = 10$  Oe.

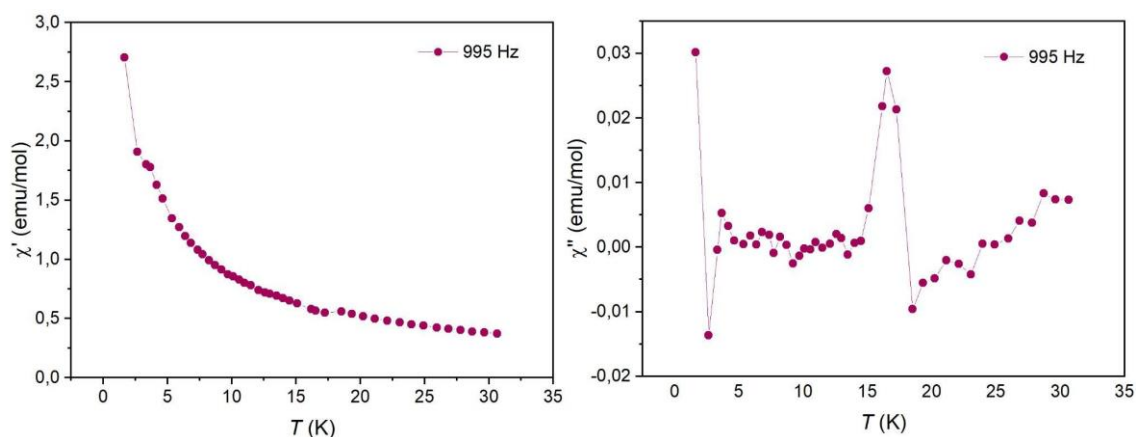

**Figure S45.** Temperature dependence of the (left) real,  $\chi'$ , and (right) imaginary,  $\chi''$ , components of the AC susceptibility for  $[\text{C}_2\text{mim}][\text{Ho}(\text{fod})_4]$  (**7**), collected at AC frequency of 995 Hz under a static field of  $H_{\text{DC}} = 0$  G.  $H_{\text{AC}} = 10$  Oe.



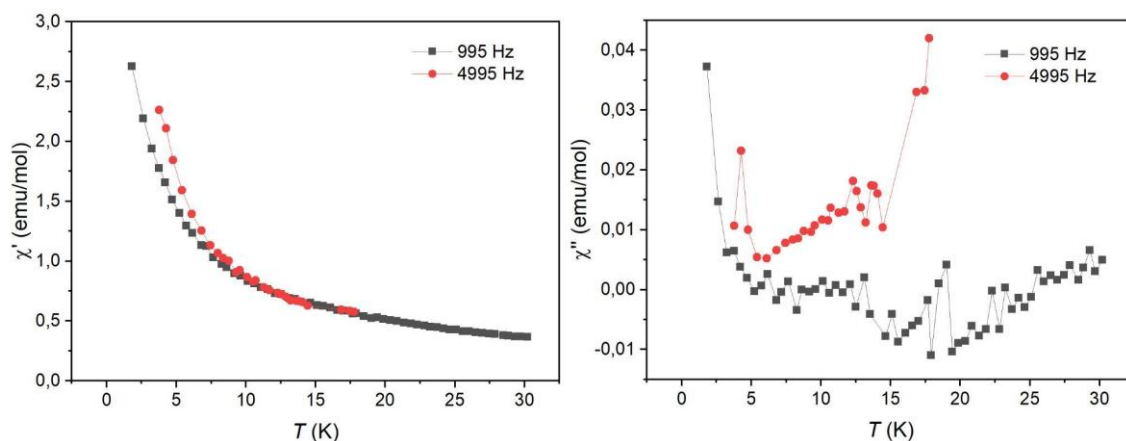

**Figure S46.** Temperature dependence of the (left) real,  $\chi'$ , and (right) imaginary,  $\chi''$ , components of the AC susceptibility for  $[\text{C}_2\text{mim}][\text{Ho}(\text{fod})_4]$  (**7**), collected at different AC frequencies under a static field of  $H_{\text{DC}} = 1000$  G.  $H_{\text{AC}} = 10$  Oe.

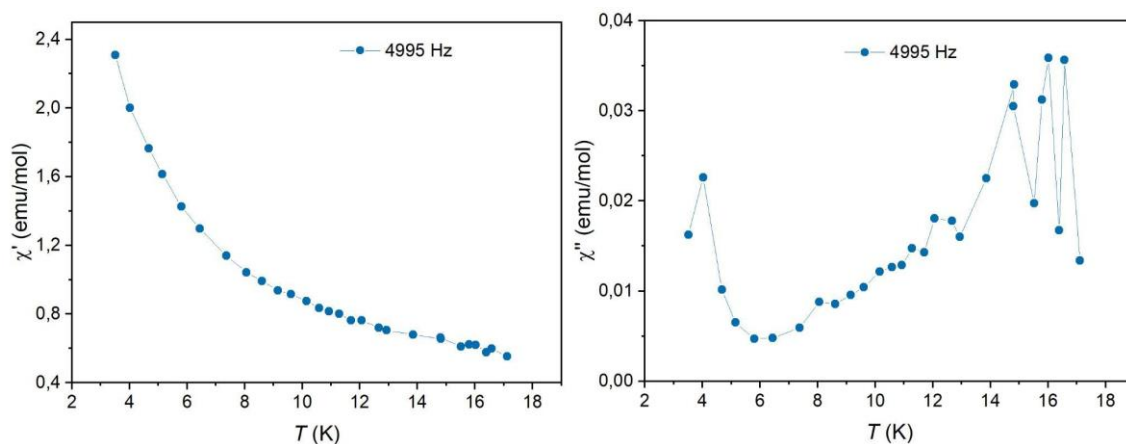

**Figure S47.** Temperature dependence of the (left) real,  $\chi'$ , and (right) imaginary,  $\chi''$ , components of the AC susceptibility for  $[\text{C}_2\text{mim}][\text{Ho}(\text{fod})_4]$  (**7**), collected at AC frequency of 4995 Hz under a static field of  $H_{\text{DC}} = 1500$  G.  $H_{\text{AC}} = 10$  Oe.

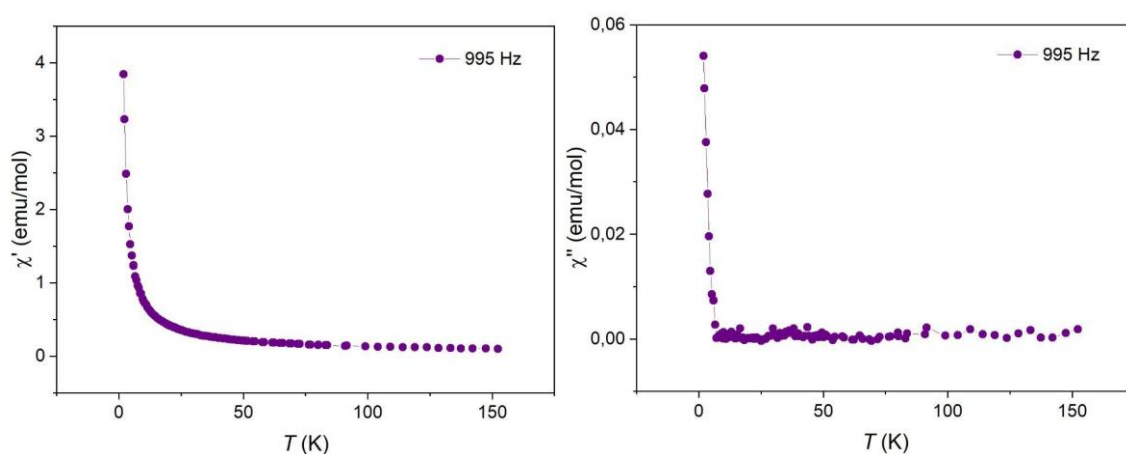

**Figure S48.** Temperature dependence of the (left) real,  $\chi'$ , and (right) imaginary,  $\chi''$ , components of the AC susceptibility for  $[\text{C}_2\text{mim}][\text{Er}(\text{fod})_4]$  (**8**), collected at AC frequency of 995 Hz under a static field of  $H_{\text{DC}} = 0$  G.  $H_{\text{AC}} = 10$  Oe.

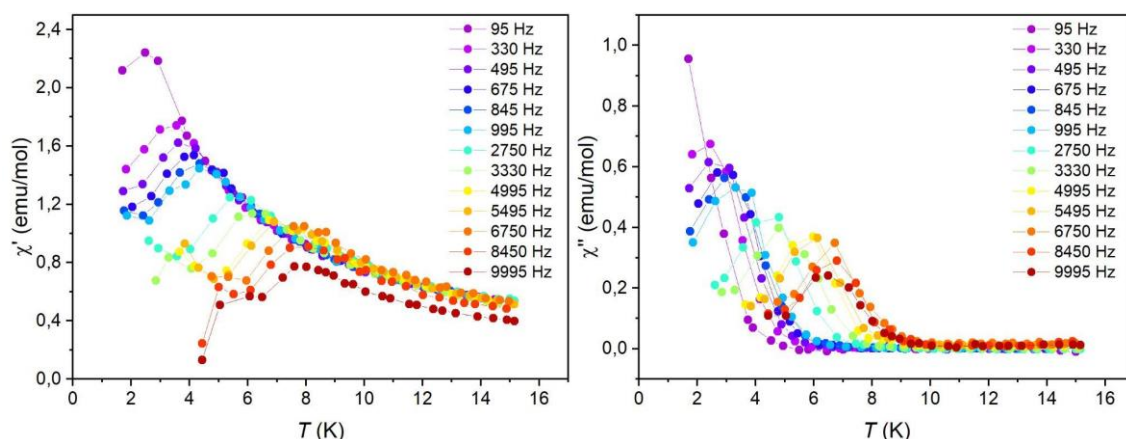

**Figure S49.** Temperature dependence of the (left) real,  $\chi'$ , and (right) imaginary,  $\chi''$ , components of the AC susceptibility for  $[\text{C}_2\text{mim}][\text{Er}(\text{fod})_4]$  (**8**), collected at several AC frequencies under a static field of  $H_{\text{DC}} = 800$  G.  $H_{\text{AC}} = 10$  Oe.

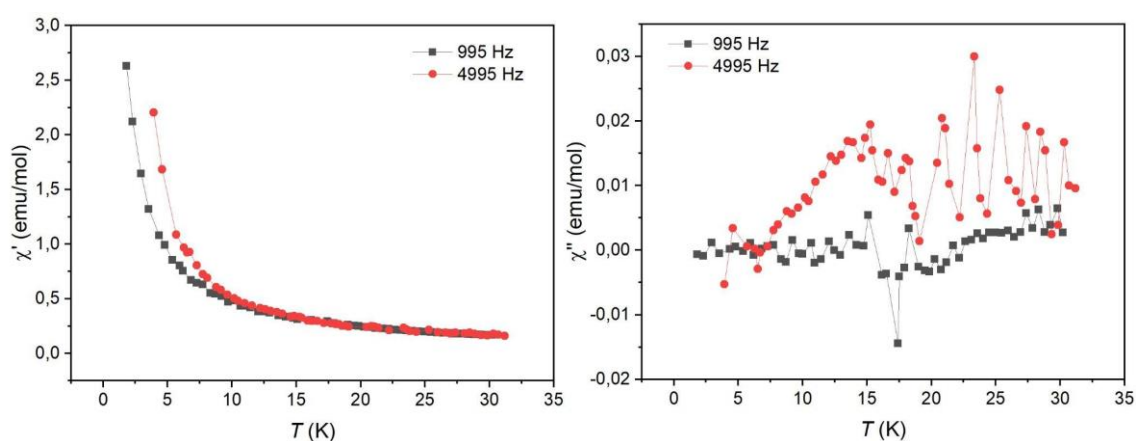

**Figure S50.** Temperature dependence of the (left) real,  $\chi'$ , and (right) imaginary,  $\chi''$ , components of the AC susceptibility for  $[\text{C}_2\text{mim}][\text{Tm}(\text{fod})_4]$  (**9**), collected at different AC frequencies under a static field of  $H_{\text{DC}} = 0$  G.  $H_{\text{AC}} = 10$  Oe.

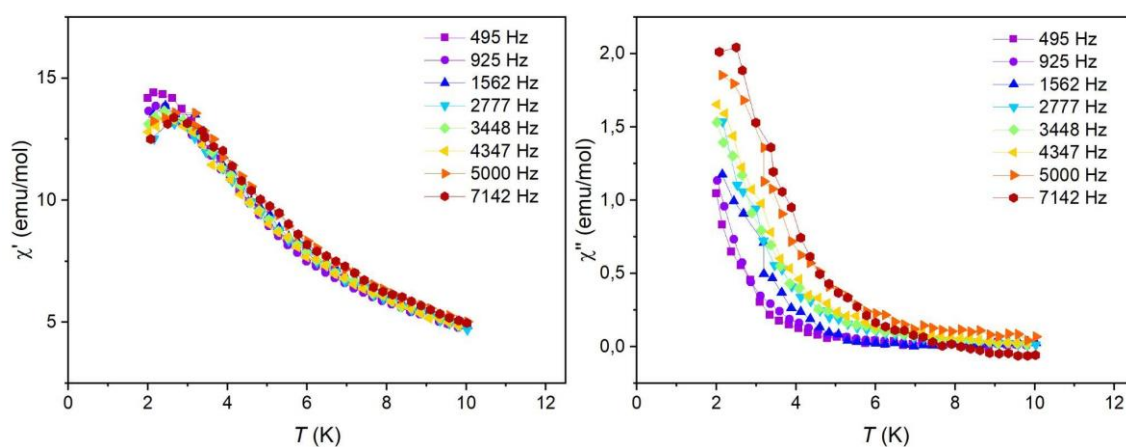

**Figure S51.** Temperature dependence of the (left) real,  $\chi'$ , and (right) imaginary,  $\chi''$ , components of the AC susceptibility for  $[\text{C}_2\text{mim}][\text{Tm}(\text{fod})_4]$  (**9**), collected at several AC frequencies under a static field of  $H_{\text{DC}} = 2500$  G.  $H_{\text{AC}} = 3$  Oe.

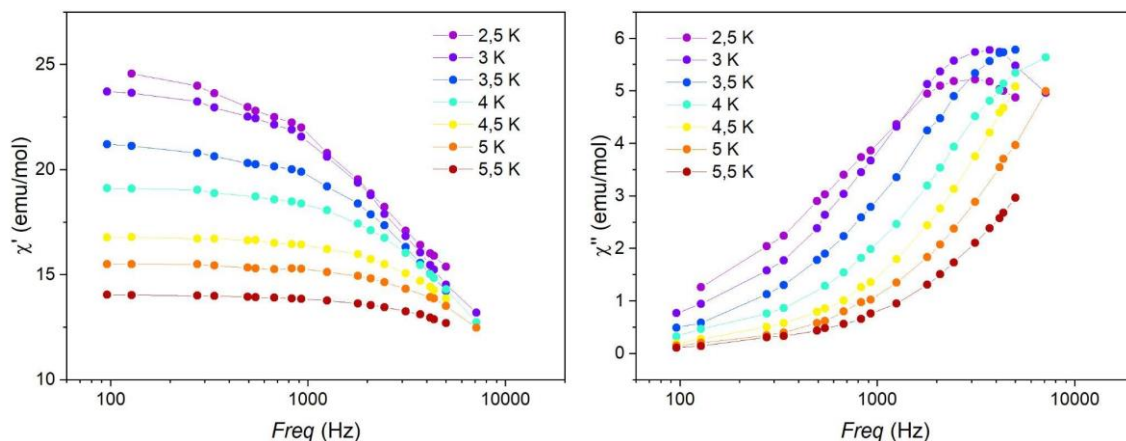

**Figure S52.** Frequency dependence of the (left) real,  $\chi'$ , and (right) imaginary,  $\chi''$ , components of the AC susceptibility for  $[\text{C}_2\text{mim}][\text{Gd}(\text{fod})_4]$  (**4**), collected at several temperature values under a static field of  $H_{\text{DC}} = 2500$  G.  $H_{\text{AC}} = 3$  Oe.

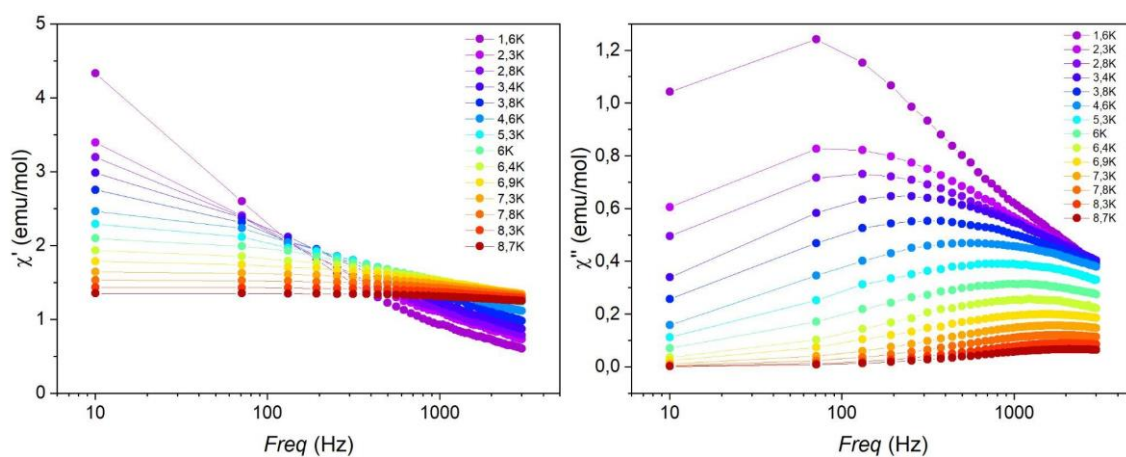

**Figure S53.** Frequency dependence of the (left) real,  $\chi'$ , and (right) imaginary,  $\chi''$ , components of the AC susceptibility for  $[\text{C}_2\text{mim}][\text{Dy}(\text{fod})_4]$  (**6**), collected at several temperature values under a static field of  $H_{\text{DC}} = 1500$  G.  $H_{\text{AC}} = 10$  Oe.

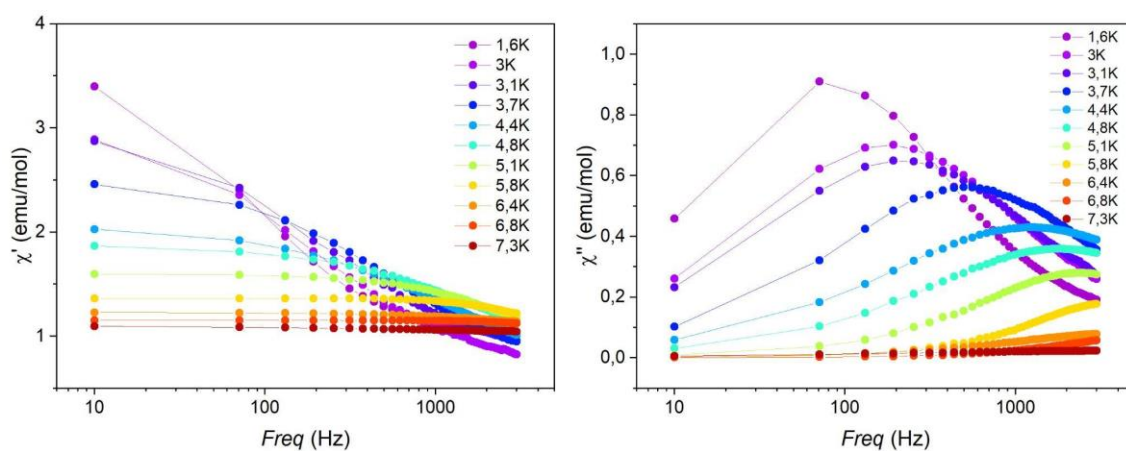

**Figure S54.** Frequency dependence of the (left) real,  $\chi'$ , and (right) imaginary,  $\chi''$ , components of the AC susceptibility for  $[\text{C}_2\text{mim}][\text{Er}(\text{fod})_4]$  (**8**), collected at several temperature values under a static field of  $H_{\text{DC}} = 800$  G.  $H_{\text{AC}} = 10$  Oe.

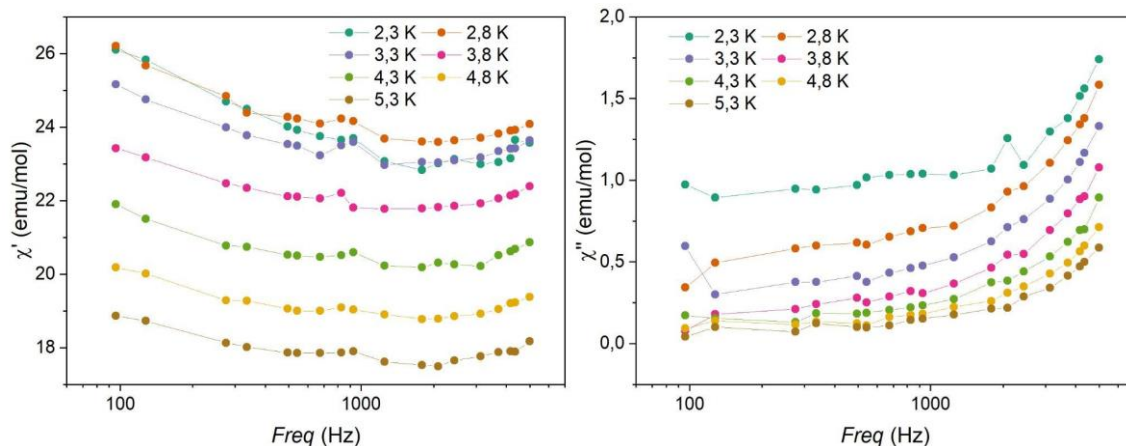

**Figure S55.** Frequency dependence of the (left) real,  $\chi'$ , and (right) imaginary,  $\chi''$ , components of the AC susceptibility for  $[\text{C}_2\text{mim}][\text{Tb}(\text{fod})_4]$  (5), collected at several temperature values under a static field of  $H_{\text{DC}} = 1500$  G.  $H_{\text{AC}} = 3$  Oe.

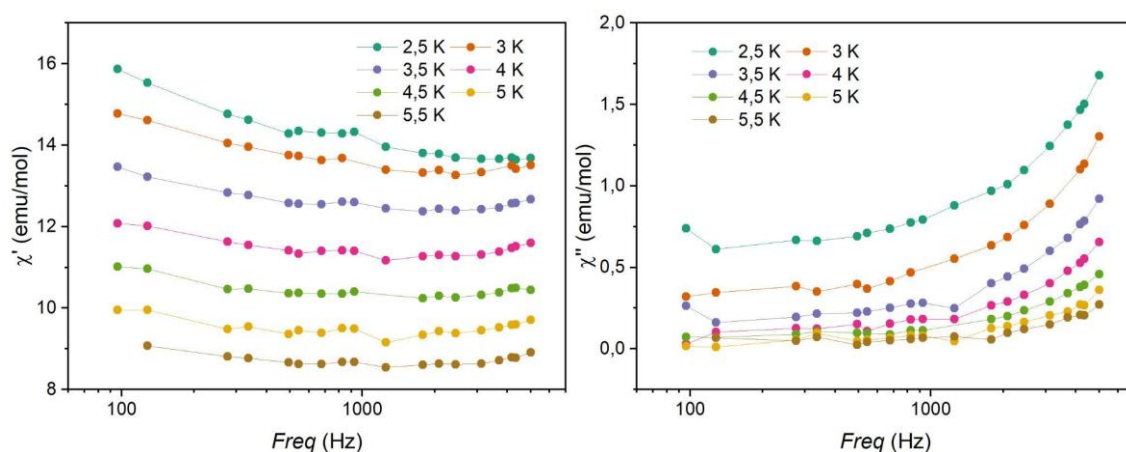

**Figure S56.** Frequency dependence of the (left) real,  $\chi'$ , and (right) imaginary,  $\chi''$ , components of the AC susceptibility for  $[\text{C}_2\text{mim}][\text{Tm}(\text{fod})_4]$  (9), collected at several temperature values under a static field of  $H_{\text{DC}} = 2500$  G.  $H_{\text{AC}} = 3$  Oe.

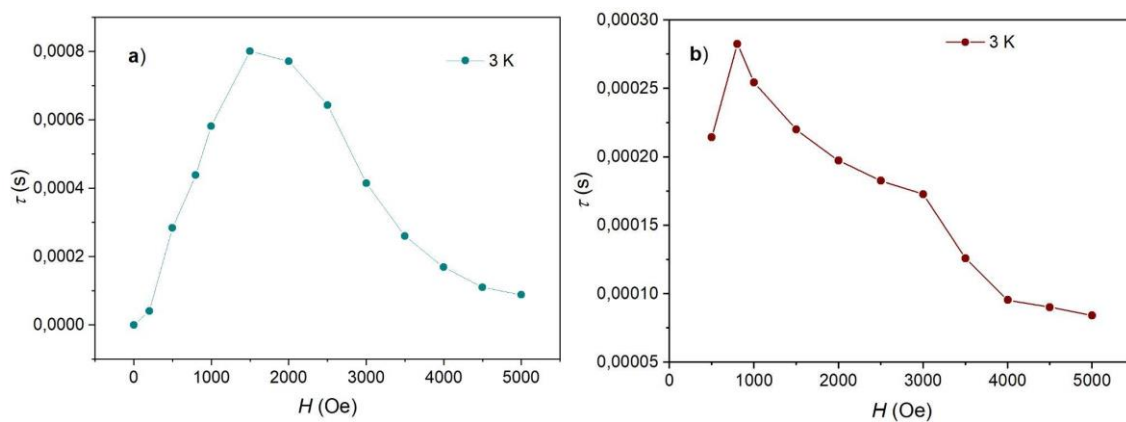

**Figure S57.** Relaxation times at different static fields for a)  $[\text{C}_2\text{mim}][\text{Dy}(\text{fod})_4]$  (6), and b)  $([\text{EMIM}][\text{Er}(\text{fod})_4])$  (8), at 3 K and  $H_{\text{AC}} = 10$  Oe.

Assuming only an Orbach relaxation process, the obtained values for  $\tau$  were plotted against the inverse of the temperature and fitted to the Arrhenius law (Eq. S1):

$$\tau(T) = \tau_0 \cdot e^{\left(\frac{U_{eff}}{k_B T}\right)} \quad (\text{Eq. S1})$$

where  $\tau_0$  is the pre-exponential factor,  $U_{eff}$  is the relaxation energy barrier and  $k_B$  is the Boltzmann constant. As shown in Figure S47, the fit deviates from linearity at low temperatures being only valid at temperatures higher than 3 K for **4** and **8**, and higher than 2.8 K for **6**, with the following parameters:  $U_{eff} = 13,06$  K with  $\tau_0 = 6,44 \times 10^{-7}$  s (**4**),  $U_{eff} = 12.19$  K with  $\tau_0 = 1,87 \times 10^{-5}$  s (**6**), and  $U_{eff} = 18.407$  K with  $\tau_0 = 1,892 \times 10^{-6}$  s (**8**).

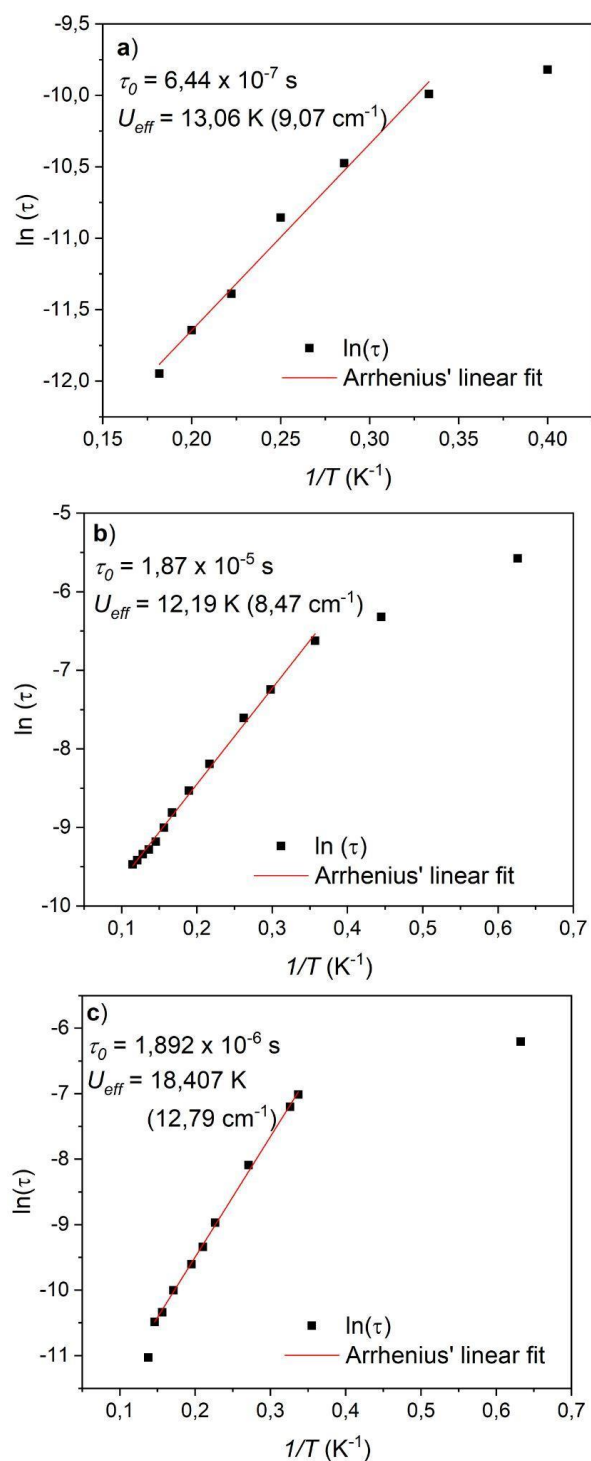

**Figure S58.** Thermal dependence of the relaxation time  $\tau$ , measured using an AC field of  $H_{\text{AC}} = 3 \text{ Oe}$ ,  $10 \text{ Oe}$  and  $10 \text{ Oe}$ , and under a static field of  $H_{\text{DC}} = 2500 \text{ G}$ ,  $1500 \text{ G}$  and  $800 \text{ G}$  for (a) **4** ( $[\text{C}_2\text{mim}][\text{Gd}(\text{fod})_4]$ ), (b) **6** ( $[\text{C}_2\text{mim}][\text{Dy}(\text{fod})_4]$ ), and (c) **8** ( $[\text{C}_2\text{mim}][\text{Er}(\text{fod})_4]$ ), respectively. The lines are fits to the Arrhenius equation (eq. S1), assuming an Orbach process.

**Table S1.** Generalized Debye model fitting parameters under a static field of  $H_{DC} = 2500$  G, in the temperature range of 2.5 to 5.5 K, for  $[C_2mim][Gd(fod)_4]$  (4).

| T (K) | $\alpha$ | $\tau$ (s) | $\chi^s$ (emu.mol <sup>-1</sup> ) | $\chi_T$ (emu.mol <sup>-1</sup> ) |
|-------|----------|------------|-----------------------------------|-----------------------------------|
| 2,5   | 0,23226  | 5,4329E-05 | 9,94754                           | 25,01735                          |
| 3     | 0,16657  | 4,5832E-05 | 8,87088                           | 23,8067                           |
| 3,5   | 0,17098  | 2,8207E-05 | 5,9053                            | 21,19856                          |
| 4     | 0,15493  | 1,9290E-05 | 4,59693                           | 19,18636                          |
| 4,5   | 0,11348  | 1,1311E-05 | 9,066E-14                         | 16,79233                          |
| 5     | 0,10962  | 8,7811E-06 | 9,194E-14                         | 15,49594                          |
| 5,5   | 0,12945  | 6,4656E-06 | 1,635E-14                         | 14,04369                          |

**Table S2.** Generalized Debye model fitting parameters under a static field of  $H_{DC} = 1500$  G, in the temperature range of 1.6 to 8.7 K, for  $[C_2mim][Dy(fod)_4]$  (6).

| T (K) | $\alpha$ | $\tau$ (s) | $\chi^s$ (emu.mol <sup>-1</sup> ) | $\chi_T$ (emu.mol <sup>-1</sup> ) |
|-------|----------|------------|-----------------------------------|-----------------------------------|
| 1.6   | 0,47369  | 0,00379    | 0,19863                           | 5,98781                           |
| 2.3   | 0,51683  | 0,0018     | 0,22144                           | 4,35386                           |
| 2.8   | 0,51889  | 0,00133    | 0,24906                           | 3,94707                           |
| 3.4   | 0,48861  | 0,000715   | 0,34175                           | 3,40158                           |
| 3.8   | 0,50252  | 0,000497   | 0,41104                           | 3,0834                            |
| 4.6   | 0,48283  | 0,000277   | 0,51827                           | 2,67819                           |
| 5.3   | 0,48866  | 0,000197   | 0,65402                           | 2,44742                           |
| 6.0   | 0,46541  | 0,000149   | 0,83673                           | 2,19929                           |
| 6.4   | 0,39597  | 0,000123   | 0,9966                            | 1,9622                            |
| 6.9   | 0,35718  | 0,000103   | 1,082                             | 1,79996                           |
| 7.3   | 0,27099  | 9,3E-05    | 1,16229                           | 1,64757                           |
| 7.8   | 0,20448  | 8,77E-05   | 1,19908                           | 1,53277                           |
| 8.3   | 0,13707  | 8,13E-05   | 1,2092                            | 1,43096                           |
| 8.7   | 0,12093  | 7,69E-05   | 1,19148                           | 1,35295                           |

**Table S3.** Generalized Debye model fitting parameters under a static field of  $H_{DC} = 800$  G, in the temperature range of 1.6 to 7.3 K, for  $[C_{2mim}][Er(fod)_4]$  (8).

| T (K) | $\alpha$ | $\tau$ (s) | $\chi_s$ (emu.mol <sup>-1</sup> ) | $\chi_T$ (emu.mol <sup>-1</sup> ) |
|-------|----------|------------|-----------------------------------|-----------------------------------|
| 1.6   | 0,27687  | 0,00202    | 0,91676                           | 3,70575                           |
| 3.0   | 0,32286  | 0,000898   | 0,65433                           | 3,06394                           |
| 3.1   | 0,32952  | 0,000747   | 0,75311                           | 3,01623                           |
| 3.7   | 0,30377  | 0,000306   | 0,65149                           | 2,50921                           |
| 4.4   | 0,37103  | 0,000127   | 0,48268                           | 2,07115                           |
| 4.8   | 0,31804  | 8,77E-05   | 0,67234                           | 1,87965                           |
| 5.1   | 0,15963  | 6,74E-05   | 0,87724                           | 1,59656                           |
| 5.8   | 4,38E-17 | 4,52E-05   | 1,00445                           | 1,36221                           |
| 6.4   | 0,25308  | 3,24E-05   | 0,97964                           | 1,22692                           |
| 6.8   | 2,37E-15 | 2,8E-05    | 1,01228                           | 1,14979                           |
| 7.3   | 0,62328  | 1,62E-05   | 0,94478                           | 1,10369                           |
